# Supplementary material for: “Two Birds with One Stone” Ruthenium(II) Complex Probe for Biothiols Discrimination and Detection In Vitro and In Vivo
Source: PubMed Central journal article supplement (PMC7375222; doi:10.1002/advs.202000458), 2020-05-29
Supplement: ADVS-7-2000458-s001.pdf [file ADVS-7-2000458-s001.pdf]

## Supporting Information

### **“Two Birds with One Stone” Ruthenium(II) Complex Probe for Biothiols Discrimination and Detection in Vitro and in Vivo**

*Chaolong Liu, Jianping Liu, Wenzhu Zhang, Yong-Lei Wang, Qi Liu, Bo Song, Jingli Yuan, Run Zhang*

C. Liu, Dr. W. Zhang, Q. Liu, Dr. B. Song, Prof. J. Yuan  
State Key Laboratory of Fine Chemicals, School of Chemical Engineering, Dalian University of Technology, Dalian 116024, China.  
E-mail: wzhzhang@dlut.edu.cn, jlyuan@dlut.edu.cn

J. Liu, Dr. R. Zhang  
Australian Institute for Bioengineering and Nanotechnology, The University of Queensland, St. Lucia, QLD 4072, Australia.  
E-mail: r.zhang@uq.edu.au

Dr. Y.-L. Wang  
Department of Materials and Environmental Chemistry, Stockholm University, Stockholm, SE-10691, Sweden

---

## Experimental section

### Reagents and instruments.

**Ru-OH** was synthesized by following the procedure reported previously.<sup>[1]</sup> NBD-Cl and BBr<sub>3</sub> were purchased from Aladdin. GSH, Cys, Hcy, Roswell Park Memorial Institute's Medium (RPMI-1640), fetal bovine serum (FBS), *L*-glutamine, penicillin and 3-(4,5-dimethylthiazol-2-yl)-2,5-diphenyltetrazolium bromide (MTT) were purchased from Life Technologies. Unless otherwise stated, all chemical materials were purchased from commercial sources and used without further purification. Deionized distilled water was used throughout.

<sup>1</sup>H NMR and <sup>13</sup>C NMR spectra were recorded on a Bruker Avance spectrometer (500 MHz for <sup>1</sup>H and 100 MHz for <sup>13</sup>C). Mass spectra were obtained using a HP1100 LC/MSD mass spectrometer. Elemental analysis was carried out on a Vario-EL analyser. Absorption spectra were measured on a Perkin-Elmer Lambda 35 UV-vis spectrometer. The measurements on the luminescence features were performed using an Edinburgh FS 50 luminescence spectrometer with excitation and emission slits of 2 nm. Confocal luminescence and time-gated luminescence imaging experiments of biothiols in live HeLa cells were carried out on a Leica SP8 laser-scanning microscope. The image analysis was performed by ImageJ software version 1.44p. Imaging of biothiols in adult zebrafish and mouse was performed on a SPECTRAL Ami Imaging Systems (Spectral Instruments Imaging, LLC, Tucson, AZ) with an excitation filter of 480 nm and an emission filter of 610 nm and 530 nm. Nude mice (6-8 weeks) and zebrafish were obtained from the Experimental Animal Center of the Dalian Medical University, China, and used according to guidelines of the Institutional Animal Care that was approved by the Animal Ethical and Welfare Committee (AEWC) of Dalian Medical University. All the data were calculated using the region of interest (ROI) function of Amiview Analysis software (Version 1.7.06), and values are presented as the mean ± SD for each group of three experiments.

### Theoretical calculation

The theoretical computation was conducted by using the Gaussian 09 package of programs.<sup>[2]</sup>

The molecular structures of **Ru-NBD** and **Ru-OH** at ground-states and excited states were firstly optimized using the density functional theory (DFT). Based on these optimized molecular structures, the related excited-state calculations were then conducted by the time-dependent DFT (TD-DFT) method. The Beck's three-parameter hybrid functional with the Lee-Yang-Parr correlation functional (B3LYP) was used throughout. The LanL2DZ basis set<sup>[3]</sup> was used for Ru atoms in both complexes, whereas 6-311\*G(d, p) basis set<sup>[4]</sup> was applied to hydrogen, carbon, nitrogen, sulphur and oxygen atoms. The polarized continuum model (PCM)<sup>[5]</sup> was employed for the solvent effects (water) in optimization, absorbance and emission calculations.

### Evaluate the PET effect by thermodynamics calculation

The thermodynamics value  $\Delta G_{PET}$ , can be determined by calculation using the Rehm-Weller equation,<sup>[6]</sup>

$$\Delta G_{PET} = E^{ox}(D^+/D) - E^{red}(A/A^-) - \Delta E_{0,0} - w_p$$

where  $E^{ox}(D^+/D)$  and  $E^{red}(A/A^-)$  are the oxidation and reduction potentials of the electron donor and acceptor, respectively. Herein, these values are approximated as the energy difference of HOMO and LUMO, which can be obtained from DFT calculations.  $\Delta E_{0,0}$  is the singlet excited energy, which can be approximately calculated as the crossing point of excitation and emission spectra of **Ru-NBD**.  $w_p$  is the work term for the charge separation state, which can be obtained by equation,

$$w_p = e^2/4\pi\epsilon R$$

where  $\epsilon$  is the dielectric constant of media, i.e. water in this work with  $\epsilon$  value of 80.36 at 20°C; R is the distance between electron donor and acceptor, *i. e.* distance between NBD and bpy, which is approximated to the distance between NO<sub>2</sub> group of NBD moiety and N atoms of bpy

ligand (calculated by the ground state geometry of **Ru-NBD**).

### Synthesis and characterization of Ru-NBD

The synthesis procedure of compound **Ru-NBD** is illustrated in Scheme S1 and

corresponding synthesis procedures were described below:

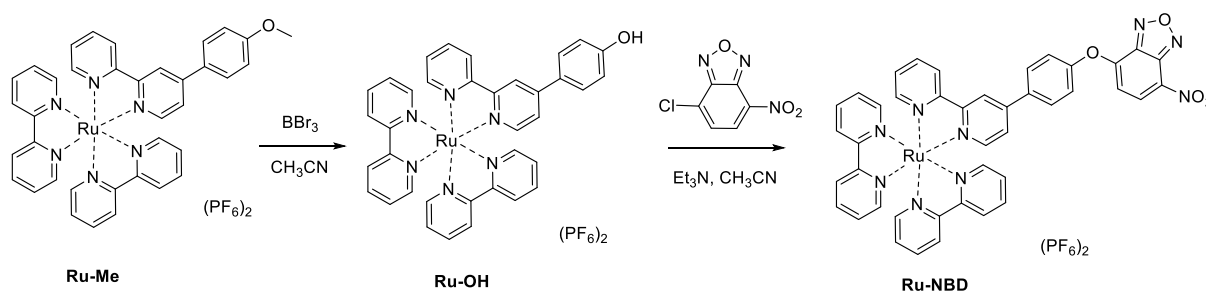

### Scheme S1. Synthesis procedure of Ru-OH and Ru-NBD.

To a solution of **Ru-OH** (67 mg, 0.07 mmol) in dry CH<sub>3</sub>CN (20 mL), NBD-Cl (70 mg, 0.35 mmol), Et<sub>3</sub>N (15 mg, 0.15 mmol) was added, and the mixture was stirred at room temperature for 5 h. The solvent was removed by rotary evaporation, and then the crude product purified by silica gel column chromatography using CH<sub>3</sub>CN-H<sub>2</sub>O-KNO<sub>3</sub> (sat.) (100:5:1, v/v/v) as eluent. The product was dissolved in 10 mL anhydrous CH<sub>3</sub>CN and filtered to remove excess KNO<sub>3</sub>. After removal of the solvent, the product was dissolved in a small amount of deionized water. Then, a saturated aqueous solution of NH<sub>4</sub>PF<sub>6</sub> was added to give a red precipitate. The product was filtered, and washed with a small amount of cold water. **Ru-NBD** was obtained as a red solid (60 mg, 77% yield). <sup>1</sup>H NMR (500 MHz, CD<sub>3</sub>CN): δ = 8.76 (s, 1H), 8.68 (d, *J* = 10.5 Hz, 1H), 8.47-8.57 (m, 5H), 8.00-8.14 (m, 7H), 7.81 (d, *J* = 6 Hz, 1H), 7.72-7.79 (m, 5H), 7.67 (d, *J* = 6.5 Hz, 1H), 7.53 (d, *J* = 10.5 Hz, 2H), 7.37-7.47 (m, 5H), 6.78 (d, *J* = 10.5 Hz, 1H). <sup>13</sup>C NMR (100 MHz, CD<sub>3</sub>CN): 157.22, 156.72, 156.66, 154.89, 152.67, 151.42, 151.35, 147.83, 145.39, 144.41, 137.54, 137.46, 134.08, 133.89, 131.12, 129.59, 127.31, 127.27, 124.51, 123.98, 121.54, 121.35, and 109.88. ESI-HRMS (*m/z*): calcd. for C<sub>42</sub>H<sub>29</sub>F<sub>6</sub>N<sub>9</sub>O<sub>4</sub>PRu: 970.1028, found: 970.0998 ([M-PF<sub>6</sub>]<sup>+</sup>); calcd. for C<sub>42</sub>H<sub>29</sub>N<sub>9</sub>O<sub>4</sub>Ru: 412.5693, found: 412.5679 ([M-

$2\text{PF}_6\text{]}^{2+}$ ). Elemental analysis calcd. (%) for  $\text{C}_{42}\text{H}_{29}\text{F}_{12}\text{N}_9\text{O}_4\text{P}_2\text{Ru}\cdot\text{H}_2\text{O}$ : C 44.15, H 2.44, N 11.53; found (%): C 44.53, H 2.76, N 11.13.

### **MS analysis of the products of Ru-NBD reacted with GSH and Cys/Hcy**

To a solution of 22.3 mg of **Ru-NBD** (0.02 mM) in 10 mL of  $\text{CH}_3\text{CN}$  was added dropwise into 5 mL of aqueous solution of GSH, Cys or Hcy (0.2 mM). After the solution was stirred at 37 °C for 2 h, the electrospray ionization (ESI) mass spectrum of the solution was measured.

### **Electrochemical Measurements.**

Cyclic voltammetry (CV) was measured on a CHI 660D electrochemical analyzer (Shanghai Chen Hua Instrument Co., Ltd.). Three electrodes were used in electrochemical experiments, including a working electrode (3.0 mm glassy carbon electrode), an auxiliary electrode (0.3 mm platinum wire), and an  $\text{Ag}/\text{AgNO}_3$  (20 mM) electrode reference electrode.

The working electrode was sonicated in 10%  $\text{HNO}_3$  for 1 min, followed by polishing with a  $\text{Al}_2\text{O}_3$  slurry and washing with water for another 1 min before the experiments. The electrochemical experiments were performed in  $\text{CH}_3\text{CN}$  (containing 0.1 M tetrabutylammonium hexafluorophosphate ( $\text{TBAPF}_6$ )).

### **General procedure for spectrometric analysis**

The reaction between **Ru-NBD** and biothiols was performed in a 50 mM Tris-HCl buffer of pH 7.4. The solution of the **Ru-NBD** (10  $\mu\text{M}$ ) was incubated with different concentrations of biothiols for 60 min, then the emission spectra of the solutions were measured under steady state and time-gated luminescence modes.

### **Time-Gated Luminescence Detection**

Time-gated emission spectra were performed based on a time-correlated single photon counting (TCSPC) technique using the Edinburgh FS50 spectrofluorometer. Under excitation of 450 nm,

the emission signals from 500 nm to 850 nm were recorded with intervals of 5 nm. The time-gated emission spectra of the mixture were acquired in the absence and presence of biothiols with a delay time of 100 ns.

### **Detection and discrimination of GSH and Cys/Hcy in vitro**

Artificial mixture solution of GSH and Cys is used in proof-of-concept experiments. The GSH and Cys were dissolved in 50 mM Tris-HCl buffer of pH 7.4 with the final concentrations of GSH (8  $\mu$ M) and Cys (8  $\mu$ M) as the stock solution. The stock solution was 8-fold diluted with 50 mM Tris-HCl buffer of pH 7.4. **Ru-NBD** (10  $\mu$ M) was then added into each sample, and the time-gated luminescence spectra were recorded for determination of total concentration of GSH and Cys. Steady state luminescence analysis was then applied to determine the concentration of Cys ( $\lambda_{em} = 540$  nm). The concentration of GSH was then calculated ( $C_{GSH} = C_{total} - C_{Cys}$ ). All of the analyses were performed three times, and the values are presented as the mean  $\pm$  SD.

### **Cell line and cell culture**

HeLa cells were purchased from American Type Cell Collection. Cells were cultured in RPMI 1640 media, supplemented with 10% FBS, 1% penicillin, 1% streptomycin sulfate in a humidified 5% CO<sub>2</sub>/95% air incubator at 37 °C. The growth medium was replaced every two days. Cells were routinely detached with trypsin-EDTA solution and then seeded in a 25 mL cell culture bottle. The cells were reached about 80% confluence prior to experiments.

### **MTT assay of cytotoxicity of Ru-NBD to HeLa cells**

The cytotoxicity of **Ru-NBD** to HeLa cells was examined by MTT assay method.<sup>[7]</sup> HeLa cells were seeded at a density of  $5 \times 10^4$  cells/mL in a 96-well micro-assay culture plate. After growth at 37 °C in a 5% CO<sub>2</sub> incubator for 24 h, the culture medium was replaced with the freshly prepared medium containing different concentrations of **Ru-NBD**. The group with the addition of culture medium only was employed as the control, and the wells containing culture media

without cells were used as blanks. After incubation at 37 °C in a 5% CO<sub>2</sub> incubator for 24 h, cell culture medium was removed, and cells were carefully washed three times with PBS. Then, the MTT solution in PBS (100 µL, 0.5 mg/mL) was added into each well for further incubation for 4 h. The excess MTT solution was then carefully removed from each well, and the formed formazan was dissolved in 100 µL of dimethyl sulfoxide (DMSO). The absorbance at 540 nm was measured in an Infinite M200 Pro Microplate Reader. The results from the five individual experiments were averaged. The following formula was used to calculate the viability of cell growth:

$$\text{Viability (\%)} = (\text{mean of absorbance value of treatment group-blank}) / (\text{mean absorbance value of control-blank}) \times 100.$$

### **Luminescence Imaging of Biothiols in HeLa Cells**

For imaging of biothiols in HeLa cells, the cells were seeded in a 20 mm cover glass bottom culture dishes at a density of  $5 \times 10^4$  cells/mL. After incubation for 24 h at 37°C in a 5% CO<sub>2</sub>/95% air incubator, the cell culture medium was removed and then the cells were incubated with **Ru-NBD** (50 µM, containing 0.2% DMSO as the co-solvent) in freshly prepared medium for 5 h. The cells were washed with PBS for three times, and then subjected to the phosphorescence imaging measurements on a microscope. In a control group, HeLa cells were treated with 100 µM NEM for 2 h. The excess NEM was discarded and cells were washed with PBS for three times. Then, the cells were incubated with **Ru-NBD** (50 µM, containing 0.2% DMSO as the co-solvent) in freshly prepared medium for another 5 h. For comparison, HeLa cells were pretreated with GSH (200 µM), Cys (200, 400, and 1600 µM), and Hcy (200, 400, and 1600 µM), respectively. After removal of these biothiols and washing with PBS for three times, the cells were incubated with **Ru-NBD** (50 µM, containing 0.2% DMSO as the co-solvent) in freshly prepared medium for another 5 h.

### **Time-gated luminescence imaging of biothiols in HeLa cells**

HeLa cells were seeded at a density of  $5 \times 10^4$  cells/mL in a cover glass bottom cell culture dish ( $\phi = 22$  mm) for time-gated luminescence cell imaging. The cell culture medium was replaced with the freshly prepared medium containing **Ru-NBD** (50  $\mu$ M, 0.2% DMSO as the co-solvent). The cells were further incubated at 37 °C in a 5% CO<sub>2</sub>/95% air incubator for 5 h. The excess **Ru-NBD** was then removed, and the cells were washed with PBS for three times. For comparison, HeLa cells were pretreated with 400  $\mu$ M Cys and Hcy, respectively for 2 h. Excess Cys and Hcy were removed and washed away, followed by the incubation with **Ru-NBD** (50  $\mu$ M, containing 0.2% DMSO as the co-solvent) in freshly prepared medium for another 5 h. The cells were then washed three times with PBS (3  $\times$  2 mL/dish) and subjected to time-gated luminescence imaging by Leica SP8 laser-scanning microscope, which is equipped with a pulsed (80 MHz) white light laser. Imaging of both green and red channels at 0-12 ns, 0-4 ns, and 4-12 ns time-gated model were conducted. The intensity analysis of each images was performed by ImagingJ software.

### **Imaging of biothiols in adult zebrafish**

For imaging of biothiols in adult zebrafish, **Ru-NBD** was dissolved with DMSO, and diluted with H<sub>2</sub>O (final concentration, 200  $\mu$ M); biothiols was dissolved directly in water; and NEM was dissolved in DMSO and then diluted with water (final concentration, 500  $\mu$ M). Four group experiments were performed for imaging of biothiols in adult zebrafish: i) zebrafish was incubated with **Ru-NBD** (200  $\mu$ M) for 1 h; ii) zebrafish was treated with NEM (500  $\mu$ M) for 1 h. After washing with water for four times, the zebrafish was then incubated with **Ru-NBD** (200  $\mu$ M) for another 1 h; iii) zebrafish was treated with NEM (500  $\mu$ M) for 1 h. After washing with water for four times, the zebrafish was then supplied with Cys (500  $\mu$ M) for 1 h, followed by the incubation with **Ru-NBD** (200  $\mu$ M) for another 1 h after four times washing with water; iv) zebrafish was treated with NEM (500  $\mu$ M) for 1 h. After washing with water for four times, the zebrafish was then supplied with GSH (500  $\mu$ M) for 1 h, followed by the incubation with



**Ru-NBD** (200  $\mu\text{M}$ ) for another 1 h after four times washing with water.

### Visualization and discrimination of biothiols in mouse

The nude mouse (6-8 week old) was anesthetized by isoflurane in a flow of oxygen during all of the experiments. For visualization and discrimination of biothiols in mouse, **Ru-NBD** and NEM were dissolved with DMSO and diluted with physiological saline; biothiols were directly dissolved with physiological saline. Five group experiments were performed: i) the mouse was subcutaneously injected with saline (50  $\mu\text{L}$ ); ii) the mouse was subcutaneously injected with **Ru-NBD** (500  $\mu\text{M}$ , 50  $\mu\text{L}$ ); iii) the mouse was subcutaneously injected with NEM (1 mM, 50  $\mu\text{L}$ ) for 1 h, followed by the injection of **Ru-NBD** (500  $\mu\text{M}$ , 50  $\mu\text{L}$ ) at the same area; iv) the mouse was subcutaneously injected with Cys (500  $\mu\text{M}$ , 50  $\mu\text{L}$ ) for 1 h, followed by the injection of **Ru-NBD** (500  $\mu\text{M}$ , 50  $\mu\text{L}$ ) at the same area; v) the mouse was subcutaneously injected with GSH (500  $\mu\text{M}$ , 50  $\mu\text{L}$ ) for 1 h, followed by the injection of **Ru-NBD** (500  $\mu\text{M}$ , 50  $\mu\text{L}$ ) at the same area. Under excitation of 480 nm LED, images were recorded at 610 nm and 530 nm emission filters in every 5 min post injection.

## 2. Theoretical computations of Ru-NBD and Ru-OH

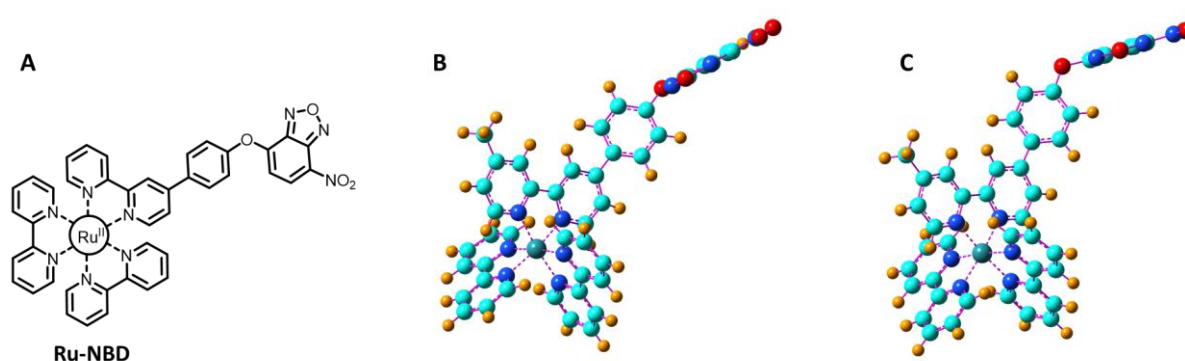

**Figure S1.** Optimized molecular geometry of **Ru-NBD** (A) in the ground state ( $S_0$ ) (B) and excited state ( $T_1$ ) (C) obtained from DFT calculations at B3LYP//6-311+G(d, p)//LANL2DZ level of theory.

**Table S1.** Cartesian coordinates of **Ru-NBD** in the ground state and excited state

| Number | Atom | Coordinates (ground state $S_0$ ) |         |         | Coordinates (excited state $T_1$ ) |         |         |
|--------|------|-----------------------------------|---------|---------|------------------------------------|---------|---------|
|        |      | X                                 | Y       | Z       | X                                  | Y       | Z       |
| 1      | C    | 3.5374                            | 3.1273  | -0.3614 | 3.2555                             | 3.2051  | -0.0879 |
| 2      | C    | 4.2549                            | 2.0221  | -2.3157 | 3.8669                             | 2.3526  | -2.2031 |
| 3      | C    | 4.4842                            | 3.2341  | -2.9651 | 3.9402                             | 3.6375  | -2.7407 |
| 4      | C    | 4.2295                            | 4.4288  | -2.2812 | 3.6627                             | 4.7320  | -1.9160 |
| 5      | C    | 3.7515                            | 4.3714  | -0.9704 | 3.3169                             | 4.5138  | -0.5797 |
| 6      | C    | 3.0364                            | 2.9578  | 1.0117  | 2.9023                             | 2.8583  | 1.2989  |
| 7      | C    | 2.4808                            | 1.4057  | 2.6966  | 2.5870                             | 1.0931  | 2.8416  |
| 8      | C    | 2.1253                            | 2.4269  | 3.5762  | 2.2573                             | 1.9894  | 3.8563  |
| 9      | C    | 2.2299                            | 3.7562  | 3.1497  | 2.2506                             | 3.3589  | 3.5718  |
| 10     | C    | 2.6903                            | 4.0202  | 1.8580  | 2.5750                             | 3.7955  | 2.2843  |
| 11     | H    | 4.4352                            | 1.0770  | -2.8082 | 4.0703                             | 1.4780  | -2.8046 |
| 12     | H    | 4.8540                            | 3.2346  | -3.9831 | 4.2091                             | 3.7674  | -3.7811 |
| 13     | H    | 3.5508                            | 5.2873  | -0.4303 | 3.1006                             | 5.3545  | 0.0650  |
| 14     | H    | 2.4179                            | 0.3659  | 2.9846  | 2.6070                             | 0.0268  | 3.0146  |
| 15     | H    | 1.7747                            | 2.1794  | 4.5707  | 2.0117                             | 1.6159  | 4.8420  |
| 16     | H    | 2.7763                            | 5.0429  | 1.5156  | 2.5696                             | 4.8527  | 2.0571  |
| 17     | C    | 0.7455                            | -1.0268 | 0.1738  | 0.8892                             | -1.2400 | 0.2483  |
| 18     | C    | -0.6215                           | -1.2256 | -0.0409 | -0.4626                            | -1.5481 | 0.1299  |
| 19     | C    | -1.3446                           | -0.3825 | -0.9025 | -1.3506                            | -0.6737 | -0.5335 |
| 20     | C    | -0.6326                           | 0.6594  | -1.5287 | -0.7999                            | 0.5146  | -1.0638 |
| 21     | C    | 0.7249                            | 0.8199  | -1.2780 | 0.5516                             | 0.7827  | -0.9152 |
| 22     | C    | 1.5692                            | -1.8656 | 1.0617  | 1.8703                             | -2.0853 | 0.9526  |
| 23     | C    | 1.0884                            | -2.9871 | 1.7491  | 1.5658                             | -3.3135 | 1.5454  |
| 24     | C    | 1.9323                            | -3.7330 | 2.5843  | 2.5600                             | -4.0559 | 2.2021  |
| 25     | C    | 3.2685                            | -3.3049 | 2.6975  | 3.8575                             | -3.5131 | 2.2360  |
| 26     | C    | 3.7024                            | -2.1878 | 1.9921  | 4.1148                             | -2.2884 | 1.6292  |
| 27     | H    | -1.1355                           | -2.0204 | 0.4822  | -0.8415                            | -2.4518 | 0.5850  |
| 28     | H    | -1.1195                           | 1.3321  | -2.2239 | -1.4089                            | 1.2211  | -1.6115 |
| 29     | H    | 1.2893                            | 1.6093  | -1.7536 | 0.9875                             | 1.6835  | -1.3219 |
| 30     | H    | 0.0554                            | -3.2916 | 1.6371  | 0.5571                             | -3.7028 | 1.5018  |
| 31     | H    | 3.9699                            | -3.8387 | 3.3287  | 4.6661                             | -4.0385 | 2.7301  |
| 32     | C    | 5.5144                            | -1.4087 | -1.3678 | 5.4831                             | -1.0127 | -1.7203 |
| 33     | C    | 3.4061                            | -1.7483 | -2.3651 | 3.3177                             | -1.5476 | -2.4941 |
| 34     | C    | 3.9417                            | -2.6460 | -3.2873 | 3.8392                             | -2.3106 | -3.5381 |
| 35     | C    | 5.3111                            | -2.9319 | -3.2382 | 5.2268                             | -2.4250 | -3.6647 |
| 36     | C    | 6.1005                            | -2.3065 | -2.2707 | 6.0541                             | -1.7708 | -2.7486 |
| 37     | C    | 6.2570                            | -0.6905 | -0.3200 | 6.2582                             | -0.2846 | -0.7023 |
| 38     | C    | 6.1000                            | 0.8226  | 1.4801  | 6.1343                             | 1.1031  | 1.2038  |
| 39     | C    | 7.4721                            | 0.7479  | 1.7149  | 7.5241                             | 1.1583  | 1.2999  |
| 40     | C    | 8.2560                            | -0.0758 | 0.8987  | 8.2947                             | 0.4704  | 0.3577  |
| 41     | C    | 7.6409                            | -0.7990 | -0.1252 | 7.6561                             | -0.2550 | -0.6514 |
| 42     | H    | 2.3547                            | -1.4981 | -2.3685 | 2.2518                             | -1.4301 | -2.3639 |
| 43     | H    | 3.2948                            | -3.1075 | -4.0234 | 3.1658                             | -2.7994 | -4.2304 |
| 44     | H    | 5.4592                            | 1.4452  | 2.0882  | 5.5022                             | 1.6185  | 1.9122  |
| 45     | H    | 7.9097                            | 1.3253  | 2.5201  | 7.9823                             | 1.7298  | 2.0968  |

|    |    |          |         |         |          |         |         |
|----|----|----------|---------|---------|----------|---------|---------|
| 46 | N  | 3.7916   | 1.9604  | -1.0415 | 3.5317   | 2.1413  | -0.9089 |
| 47 | N  | 1.4150   | 0.0007  | -0.4450 | 1.3927   | -0.0720 | -0.2783 |
| 48 | N  | 5.4965   | 0.1213  | 0.4868  | 5.5152   | 0.3950  | 0.2288  |
| 49 | N  | 4.1684   | -1.1384 | -1.4224 | 4.1200   | -0.9115 | -1.6072 |
| 50 | N  | 2.9272   | 1.6568  | 1.4397  | 2.9055   | 1.5162  | 1.5938  |
| 51 | N  | 2.8782   | -1.4729 | 1.1840  | 3.1442   | -1.5833 | 1.0002  |
| 52 | Ru | 3.4476   | 0.1906  | 0.0330  | 3.4207   | 0.2507  | 0.0091  |
| 53 | H  | 8.2357   | -1.4370 | -0.7655 | 8.2438   | -0.7874 | -1.3867 |
| 54 | H  | 7.1601   | -2.5196 | -2.2211 | 7.1286   | -1.8542 | -2.8371 |
| 55 | H  | 0.3857   | -5.1511 | 3.1039  | 1.2098   | -5.6678 | 2.7010  |
| 56 | H  | 2.0253   | -5.8295 | 3.0789  | 2.8914   | -6.1695 | 2.4323  |
| 57 | H  | 1.5243   | -4.7933 | 4.4160  | 2.4517   | -5.3392 | 3.9252  |
| 58 | H  | 5.7574   | -3.6275 | -3.9391 | 5.6615   | -3.0130 | -4.4640 |
| 59 | H  | 9.3256   | -0.1542 | 1.0546  | 9.3766   | 0.4964  | 0.4046  |
| 60 | H  | 4.3988   | 5.3871  | -2.7580 | 3.7131   | 5.7420  | -2.3043 |
| 61 | C  | -2.7950  | -0.5825 | -1.1406 | -2.7857  | -0.9849 | -0.6549 |
| 62 | C  | -3.6453  | 0.5237  | -1.3493 | -3.7425  | 0.0497  | -0.7563 |
| 63 | C  | -3.3498  | -1.8788 | -1.1758 | -3.2438  | -2.3241 | -0.6641 |
| 64 | C  | -5.0116  | 0.3478  | -1.5805 | -5.1051  | -0.2315 | -0.8505 |
| 65 | H  | -3.2460  | 1.5314  | -1.3171 | -3.4314  | 1.0877  | -0.7293 |
| 66 | C  | -4.7153  | -2.0687 | -1.4049 | -4.6004  | -2.6169 | -0.7669 |
| 67 | H  | -2.7143  | -2.7483 | -1.0488 | -2.5380  | -3.1457 | -0.6177 |
| 78 | C  | -5.5236  | -0.9497 | -1.5905 | -5.5250  | -1.5673 | -0.8502 |
| 69 | H  | -5.6568  | 1.2032  | -1.7467 | -5.8237  | 0.5761  | -0.9167 |
| 70 | H  | -5.1459  | -3.0622 | -1.4423 | -4.9535  | -3.6412 | -0.7838 |
| 71 | O  | -6.8953  | -1.1876 | -1.9087 | -6.8696  | -1.9465 | -0.9662 |
| 72 | C  | -7.9394  | -0.6007 | -1.2474 | -7.9023  | -1.0049 | -0.7887 |
| 73 | C  | -9.1321  | -0.4480 | -1.9259 | -8.7346  | -0.6832 | -1.8538 |
| 74 | C  | -7.9011  | -0.2208 | 0.1404  | -8.1844  | -0.4757 | 0.4941  |
| 75 | C  | -10.2816 | 0.0830  | -1.2915 | -9.8326  | 0.1757  | -1.6916 |
| 76 | H  | -9.1812  | -0.7369 | -2.9675 | -8.5242  | -1.1075 | -2.8283 |
| 77 | C  | -9.0829  | 0.3175  | 0.7965  | -9.3173  | 0.4250  | 0.6856  |
| 78 | C  | -10.2849 | 0.4689  | 0.0373  | -10.1460 | 0.7484  | -0.4425 |
| 79 | H  | -11.1917 | 0.1959  | -1.8665 | -10.4619 | 0.4150  | -2.5364 |
| 80 | N  | -11.4794 | 1.0003  | 0.6198  | -11.2371 | 1.6059  | -0.3203 |
| 81 | O  | -11.4571 | 1.3462  | 1.8452  | -11.5246 | 2.1312  | 0.8392  |
| 82 | O  | -12.5264 | 1.1119  | -0.1011 | -11.9653 | 1.8789  | -1.3748 |
| 83 | N  | -6.8971  | -0.3099 | 1.0065  | -7.5356  | -0.6775 | 1.6462  |
| 84 | N  | -8.8141  | 0.5706  | 2.0771  | -9.3954  | 0.8028  | 1.9615  |
| 85 | O  | -7.4332  | 0.1763  | 2.2219  | -8.2750  | 0.1212  | 2.6042  |

A

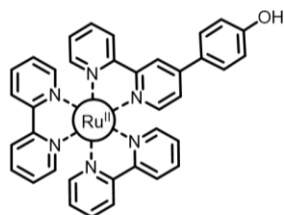

B

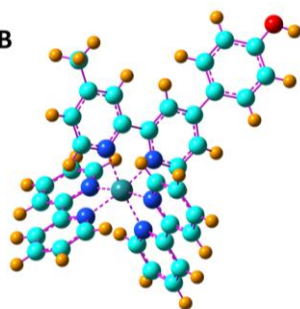

C

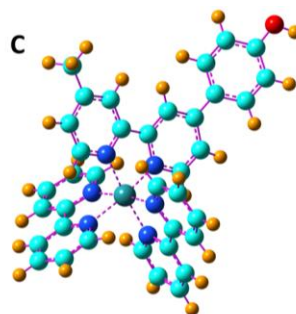

**Figure S2.** Optimized molecular geometry of **Ru-OH** (A) in the ground state ( $S_0$ ) (B) and excited state ( $T_1$ ) (C) obtained from DFT calculations at B3LYP//6-311+G(d, p)//LANL2DZ level of theory.

**Table S2.** Cartesian coordinates of **Ru-OH** in the ground state and excited state

| Number | Atom | Coordinates (ground state $S_0$ ) |         |         | Coordinates (excited state $T_1$ ) |         |         |
|--------|------|-----------------------------------|---------|---------|------------------------------------|---------|---------|
|        |      | X                                 | Y       | Z       | X                                  | Y       | Z       |
| 1      | C    | -1.7346                           | -3.0014 | 0.1353  | -1.7358                            | -3.0160 | 0.1096  |
| 2      | C    | -2.0408                           | -2.2358 | -2.0494 | -1.9789                            | -2.2443 | -2.0809 |
| 3      | C    | -2.3799                           | -3.5076 | -2.5007 | -2.3423                            | -3.5090 | -2.5369 |
| 4      | C    | -2.3946                           | -4.5610 | -1.5858 | -2.4032                            | -4.5577 | -1.6205 |
| 5      | C    | -2.0677                           | -4.3027 | -0.2568 | -2.0958                            | -4.3080 | -0.2839 |
| 6      | C    | -1.3706                           | -2.6327 | 1.5183  | -1.3864                            | -2.6525 | 1.5005  |
| 7      | C    | -0.7630                           | -0.8968 | 2.9575  | -0.7651                            | -0.9182 | 2.9498  |
| 8      | C    | -0.6792                           | -1.7611 | 4.0448  | -0.7063                            | -1.7843 | 4.0368  |
| 9      | C    | -0.9530                           | -3.1149 | 3.8472  | -0.9997                            | -3.1324 | 3.8327  |
| 10     | C    | -1.3028                           | -3.5515 | 2.5717  | -1.3432                            | -3.5694 | 2.5541  |
| 11     | H    | -2.0141                           | -1.3905 | -2.7259 | -1.9149                            | -1.4008 | -2.7574 |
| 12     | H    | -2.6256                           | -3.6578 | -3.5464 | -2.5704                            | -3.6554 | -3.5869 |
| 13     | H    | -2.0746                           | -5.1096 | 0.4655  | -2.1398                            | -5.1134 | 0.4384  |
| 14     | H    | -0.5613                           | 0.1616  | 3.0673  | -0.5464                            | 0.1373  | 3.0525  |
| 15     | H    | -0.4037                           | -1.3720 | 5.0191  | -0.4342                            | -1.4016 | 5.0141  |
| 16     | H    | -1.5186                           | -4.5992 | 2.4020  | -1.5706                            | -4.6144 | 2.3855  |
| 17     | C    | 1.6062                            | 0.7623  | 0.2942  | 1.5779                             | 0.8160  | 0.2829  |
| 18     | C    | 2.9998                            | 0.7486  | 0.2303  | 2.9745                             | 0.7785  | 0.2045  |
| 19     | C    | 3.6866                            | -0.3225 | -0.3640 | 3.6693                             | -0.3040 | -0.3418 |
| 20     | C    | 2.8949                            | -1.3630 | -0.8820 | 2.8508                             | -1.4095 | -0.8258 |
| 21     | C    | 1.5127                            | -1.2962 | -0.7840 | 1.4899                             | -1.3430 | -0.7510 |
| 22     | C    | 0.8302                            | 1.8592  | 0.9122  | 0.8220                             | 1.8725  | 0.8900  |
| 23     | C    | 1.4137                            | 3.0040  | 1.4647  | 1.3757                             | 3.0652  | 1.4220  |
| 24     | C    | 0.6244                            | 4.0027  | 2.0420  | 0.5725                             | 4.0317  | 2.0036  |
| 25     | C    | -0.7633                           | 3.7984  | 2.0374  | -0.8240                            | 3.7880  | 2.0453  |
| 26     | C    | -1.2881                           | 2.6442  | 1.4730  | -1.3235                            | 2.6154  | 1.5077  |
| 27     | H    | 3.5619                            | 1.5628  | 0.6692  | 3.5267                             | 1.6092  | 0.6263  |
| 28     | H    | 3.3406                            | -2.2160 | -1.3816 | 3.2985                             | -2.2798 | -1.2885 |
| 29     | H    | 0.8920                            | -2.0881 | -1.1861 | 0.8761                             | -2.1500 | -1.1326 |
| 30     | H    | 2.4903                            | 3.1260  | 1.4481  | 2.4471                             | 3.2249  | 1.3700  |
| 31     | H    | -1.4382                           | 4.5314  | 2.4688  | -1.5055                            | 4.5054  | 2.4908  |
| 32     | C    | -2.8509                           | 1.4448  | -1.9380 | -2.8030                            | 1.4982  | -1.9104 |
| 33     | C    | -0.6415                           | 1.3078  | -2.6832 | -0.5724                            | 1.3959  | -2.6070 |
| 34     | C    | -0.9302                           | 2.0422  | -3.8292 | -0.8371                            | 2.1763  | -3.7283 |
| 35     | C    | -2.2369                           | 2.4898  | -4.0263 | -2.1398                            | 2.6271  | -3.9378 |
| 36     | C    | -3.2041                           | 2.1864  | -3.0711 | -3.1303                            | 2.2833  | -3.0205 |
| 37     | C    | -3.8052                           | 1.0736  | -0.8734 | -3.7823                            | 1.0818  | -0.8848 |
| 38     | C    | -4.0854                           | -0.0165 | 1.1732  | -4.1078                            | -0.1092 | 1.0984  |
| 39     | C    | -5.4408                           | 0.2961  | 1.2108  | -5.4643                            | 0.2011  | 1.1202  |
| 40     | C    | -5.9886                           | 1.0282  | 0.1569  | -5.9862                            | 0.9852  | 0.0919  |
| 41     | C    | -5.1609                           | 1.4201  | -0.8926 | -5.1366                            | 1.4289  | -0.9193 |
| 42     | H    | 0.3578                            | 0.9366  | -2.4923 | 0.4214                             | 1.0174  | -2.4048 |

|    |    |         |         |         |         |         |         |
|----|----|---------|---------|---------|---------|---------|---------|
| 43 | H  | -0.1421 | 2.2524  | -4.5442 | -0.0329 | 2.4172  | -4.4146 |
| 44 | H  | -3.6181 | -0.5781 | 1.9728  | -3.6613 | -0.7110 | 1.8806  |
| 45 | H  | -6.0435 | -0.0305 | 2.0513  | -6.0861 | -0.1673 | 1.9285  |
| 46 | N  | -1.7251 | -1.9784 | -0.7655 | -1.6842 | -1.9989 | -0.7926 |
| 47 | N  | 0.8643  | -0.2631 | -0.2121 | 0.8075  | -0.2721 | -0.2306 |
| 48 | N  | -3.2795 | 0.3580  | 0.1610  | -3.2838 | 0.3197  | 0.1254  |
| 49 | N  | -1.5717 | 1.0105  | -1.7555 | -1.5279 | 1.0620  | -1.7194 |
| 50 | N  | -1.0993 | -1.3122 | 1.7210  | -1.0964 | -1.3384 | 1.7145  |
| 51 | N  | -0.5196 | 1.6858  | 0.9184  | -0.5414 | 1.6718  | 0.9458  |
| 52 | Ru | -1.2231 | -0.0845 | 0.0111  | -1.1766 | -0.1044 | 0.0178  |
| 53 | H  | -5.5712 | 1.9906  | -1.7168 | -5.5296 | 2.0385  | -1.7233 |
| 54 | H  | -4.2230 | 2.5257  | -3.2104 | -4.1464 | 2.6249  | -3.1719 |
| 55 | H  | 2.3198  | 5.2473  | 2.5419  | 2.2312  | 5.3444  | 2.4565  |
| 56 | H  | 0.8336  | 6.1420  | 2.1606  | 0.7094  | 6.1813  | 2.0837  |
| 57 | H  | 0.9848  | 5.3135  | 3.7107  | 0.9119  | 5.3862  | 3.6447  |
| 58 | H  | -2.5020 | 3.0649  | -4.9078 | -2.3857 | 3.2364  | -4.8015 |
| 59 | H  | -7.0412 | 1.2923  | 0.1497  | -7.0385 | 1.2500  | 0.0736  |
| 60 | H  | -2.6549 | -5.5672 | -1.8983 | -2.6847 | -5.5570 | -1.9364 |
| 61 | C  | 5.1630  | -0.3521 | -0.4342 | 5.1256  | -0.3471 | -0.4142 |
| 62 | C  | 5.8648  | -1.5710 | -0.3831 | 5.8207  | -1.5704 | -0.5960 |
| 63 | C  | 5.9132  | 0.8352  | -0.5512 | 5.9164  | 0.8285  | -0.3035 |
| 64 | C  | 7.2566  | -1.6088 | -0.4409 | 7.2095  | -1.6236 | -0.6456 |
| 65 | H  | 5.3252  | -2.5065 | -0.2686 | 5.2736  | -2.5038 | -0.6716 |
| 66 | C  | 7.3028  | 0.8100  | -0.6173 | 7.3004  | 0.7861  | -0.3566 |
| 67 | H  | 5.4079  | 1.7942  | -0.6204 | 5.4381  | 1.7970  | -0.2001 |
| 68 | C  | 7.9806  | -0.4151 | -0.5593 | 7.9593  | -0.4449 | -0.5234 |
| 69 | H  | 7.7772  | -2.5615 | -0.3837 | 7.7119  | -2.5794 | -0.7736 |
| 70 | H  | 7.8709  | 1.7295  | -0.7212 | 7.8874  | 1.6966  | -0.2805 |
| 71 | O  | 9.3449  | -0.3813 | -0.6230 | 9.3223  | -0.4250 | -0.5643 |
| 72 | H  | 9.7103  | -1.2813 | -0.5808 | 9.6738  | -1.3245 | -0.6786 |

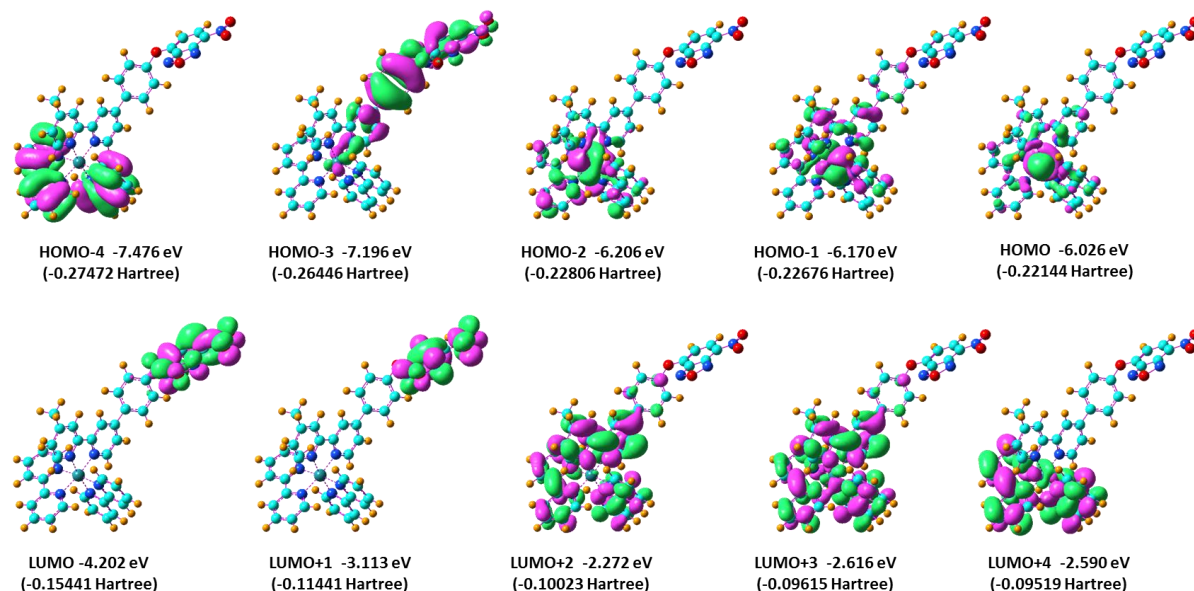

**Figure S3.** Representative frontier molecular orbital distributions of **Ru-NBD** and their corresponding energy at ground state ( $S_0$ ) optimized geometries (isodensity contour = 0.02 a.u.).

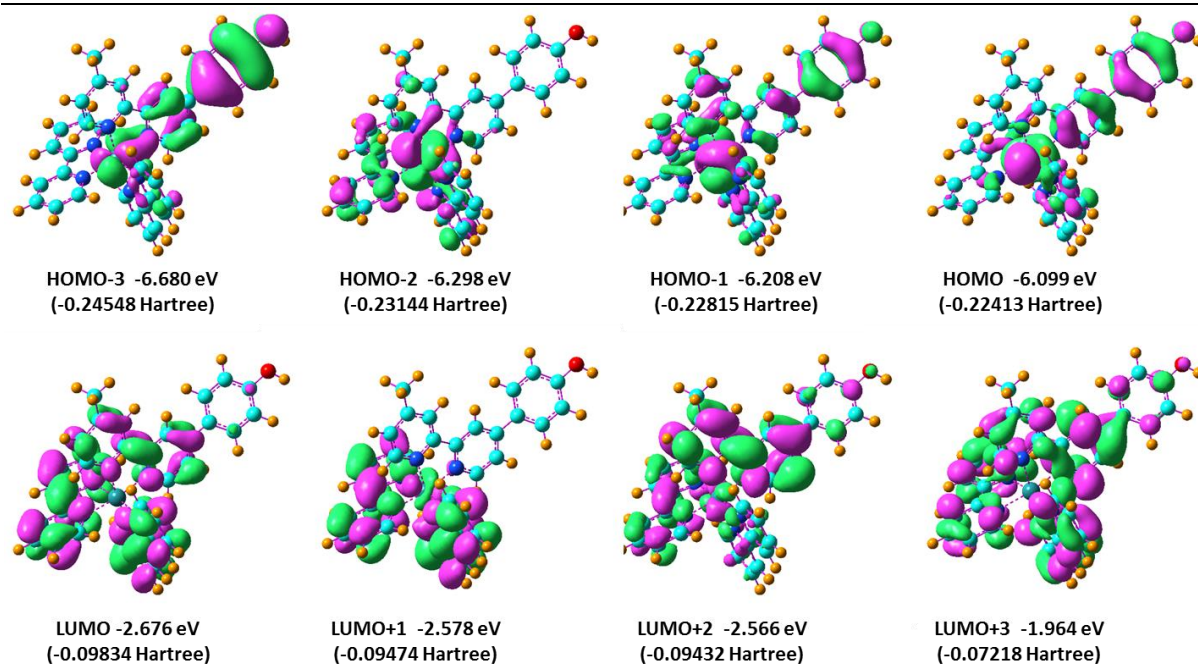

**Figure S4.** Representative frontier molecular orbital distributions of **Ru-OH** and their corresponding energy at ground state ( $S_0$ ) optimized geometries (isodensity contour = 0.02 a.u.).

**Table S3.** Absorptions of **Ru-NBD** and **Ru-OH** in aqueous solution from the calculation conducted by TDDFT//B3LYP//6-311+G(d, p), based on the optimized molecular geometries in the ground state.

| Complexes      | State          | Energy (eV) <sup>a</sup> | Wavelength (nm) | $f^b$         | Composition <sup>c</sup> | Contribution <sup>d</sup> (%)            | Assignment <sup>e</sup>                  |
|----------------|----------------|--------------------------|-----------------|---------------|--------------------------|------------------------------------------|------------------------------------------|
| <b>Ru-NBD</b>  | S <sub>1</sub> | 1.5905                   | 779.55          | 0.0063        | HOMO→LUMO                | 99.13                                    | ET                                       |
|                | S <sub>2</sub> | 1.7244                   | 718.99          | 0.0127        | HOMO-1→LUMO              | 97.99                                    | ET                                       |
|                | S <sub>3</sub> | 1.7797                   | 696.66          | 0.0003        | HOMO-2→LUMO              | 98.91                                    | ET                                       |
|                | S <sub>4</sub> | 2.4698                   | 502.00          | 0.0116        | HOMO→LUMO+2              | 63.22                                    | <sup>1</sup> MLCT,<br><sup>1</sup> ML'CT |
|                |                |                          |                 |               | HOMO→LUMO+3              | 37.72                                    | <sup>1</sup> MLCT,<br><sup>1</sup> ML'CT |
|                |                |                          |                 |               | HOMO→LUMO+2              | 33.16                                    | <sup>1</sup> MLCT,<br><sup>1</sup> ML'CT |
|                |                |                          |                 |               | HOMO→LUMO+3              | 49.66                                    | <sup>1</sup> MLCT,<br><sup>1</sup> ML'CT |
|                | S <sub>5</sub> | 2.4827                   | 499.40          | 0.0014        | HOMO→LUMO+4              | 14.93                                    | <sup>1</sup> MLCT,<br><sup>1</sup> ML'CT |
|                |                |                          |                 |               | HOMO→LUMO+3              | 15.36                                    | <sup>1</sup> MLCT,<br><sup>1</sup> ML'CT |
|                | S <sub>6</sub> | 2.4854                   | 498.84          | 0.0002        | HOMO→LUMO+4              | 80.79                                    | <sup>1</sup> MLCT                        |
|                |                |                          |                 |               | HOMO-3→LUMO              | 92.76                                    | ET, <sup>1</sup> IL'CT                   |
|                | S <sub>7</sub> | 2.5144                   | 493.10          | 0.1721        | HOMO-3→LUMO              | 92.76                                    | ET, <sup>1</sup> IL'CT                   |
| S <sub>8</sub> | 2.6567         | 466.68                   | 0.0008          | HOMO-2→LUMO+3 | 43.61                    | <sup>1</sup> MLCT,<br><sup>1</sup> ML'CT |                                          |
|                |                |                          |                 | HOMO-1→LUMO+4 | 50.45                    | <sup>1</sup> MLCT                        |                                          |
|                |                |                          |                 | HOMO-1→LUMO+2 | 74.17                    | <sup>1</sup> MLCT,<br><sup>1</sup> ML'CT |                                          |
| S <sub>9</sub> | 2.6787         | 462.86                   | 0.0414          | HOMO-1→LUMO+2 | 17.57                    | <sup>1</sup> MLCT,<br><sup>1</sup> ML'CT |                                          |
|                |                |                          |                 | HOMO-1→LUMO+3 | 17.57                    | <sup>1</sup> MLCT,<br><sup>1</sup> ML'CT |                                          |

|                 |                 |        |        |                   |                   |                                                              |                                                              |
|-----------------|-----------------|--------|--------|-------------------|-------------------|--------------------------------------------------------------|--------------------------------------------------------------|
|                 | S <sub>10</sub> | 2.6887 | 461.13 | 0.0010            | HOMO-<br>2→LUMO+2 | 98.43                                                        | ET                                                           |
| <b>Ru-OH</b>    | S <sub>1</sub>  | 2.6116 | 474.74 | 0.0021            | HOMO→LUMO         | 70.36                                                        | <sup>1</sup> ML'CT,<br><sup>1</sup> MLCT, <sup>1</sup> IL'CT |
|                 |                 |        |        |                   | HOMO→LUMO+2       | 17.26                                                        | <sup>1</sup> ML'CT,<br><sup>1</sup> MLCT, <sup>1</sup> IL'CT |
|                 | S <sub>2</sub>  | 2.6180 | 473.58 | 0.0001            | HOMO-<br>1→LUMO+1 | 11.04                                                        | <sup>1</sup> MLCT,<br><sup>1</sup> L'LCT                     |
|                 |                 |        |        |                   | HOMO→LUMO+1       | 84.61                                                        | <sup>1</sup> MLCT,<br><sup>1</sup> L'LCT                     |
|                 | S <sub>3</sub>  | 2.6687 | 464.58 | 0.0099            | HOMO-<br>1→LUMO+2 | 10.55                                                        | <sup>1</sup> ML'CT,<br><sup>1</sup> MLCT, <sup>1</sup> IL'CT |
|                 |                 |        |        |                   | HOMO→LUMO         | 18.34                                                        | <sup>1</sup> ML'CT,<br><sup>1</sup> MLCT, <sup>1</sup> IL'CT |
|                 |                 |        |        |                   | HOMO→LUMO+2       | 65.67                                                        | <sup>1</sup> ML'CT,<br><sup>1</sup> MLCT, <sup>1</sup> IL'CT |
|                 | S <sub>4</sub>  | 2.7726 | 447.17 | 0.0111            | HOMO-1→LUMO       | 43.00                                                        | <sup>1</sup> ML'CT,<br><sup>1</sup> MLCT, <sup>1</sup> IL'CT |
|                 |                 |        |        |                   | HOMO-<br>1→LUMO+1 | 30.82                                                        | <sup>1</sup> MLCT, <sup>1</sup> IL'CT                        |
|                 | S <sub>5</sub>  | 2.7833 | 445.46 | 0.0214            | HOMO-2→LUMO       | 10.19                                                        | <sup>1</sup> ML'CT,<br><sup>1</sup> MLCT                     |
|                 |                 |        |        |                   | HOMO-<br>2→LUMO+1 | 13.33                                                        | <sup>1</sup> MLCT                                            |
|                 |                 |        |        |                   | HOMO-1→LUMO       | 13.19                                                        | <sup>1</sup> ML'CT,<br><sup>1</sup> MLCT, <sup>1</sup> IL'CT |
|                 |                 |        |        |                   | HOMO-<br>1→LUMO+1 | 24.08                                                        | <sup>1</sup> MLCT, <sup>1</sup> IL'CT                        |
|                 | S <sub>6</sub>  | 2.8589 | 433.68 | 0.0296            | HOMO-2→LUMO       | 68.74                                                        | <sup>1</sup> MLCT,<br>1ML'CT                                 |
|                 |                 |        |        |                   | HOMO-<br>2→LUMO+2 | 17.77                                                        | <sup>1</sup> MLCT,<br>1ML'CT                                 |
|                 | S <sub>7</sub>  | 2.9109 | 425.92 | 0.2253            | HOMO-2→LUMO       | 12.99                                                        | <sup>1</sup> MLCT,<br>1ML'CT                                 |
|                 |                 |        |        |                   | HOMO-<br>2→LUMO+1 | 29.57                                                        | <sup>1</sup> MLCT                                            |
|                 |                 |        |        |                   | HOMO-<br>1→LUMO+2 | 37.31                                                        | <sup>1</sup> ML'CT,<br><sup>1</sup> MLCT, <sup>1</sup> IL'CT |
|                 | S <sub>8</sub>  | 2.9196 | 424.65 | 0.0950            | HOMO-<br>2→LUMO+2 | 55.44                                                        | <sup>1</sup> MLCT,<br>1ML'CT                                 |
|                 |                 |        |        |                   | HOMO-<br>1→LUMO+1 | 18.95                                                        | <sup>1</sup> MLCT, <sup>1</sup> IL'CT                        |
| S <sub>9</sub>  | 3.1313          | 395.95 | 0.0009 | HOMO-<br>2→LUMO+1 | 41.33             | <sup>1</sup> MLCT                                            |                                                              |
|                 |                 |        |        | HOMO-<br>2→LUMO+2 | 10.21             | <sup>1</sup> MLCT,<br>1ML'CT                                 |                                                              |
|                 |                 |        |        | HOMO-<br>1→LUMO+2 | 25.45             | <sup>1</sup> ML'CT,<br><sup>1</sup> MLCT, <sup>1</sup> IL'CT |                                                              |
| S <sub>10</sub> | 3.4208          | 362.44 | 0.0280 | HOMO→LUMO+3       | 87.54             | <sup>1</sup> ML'CT,<br><sup>1</sup> MLCT                     |                                                              |

<sup>a</sup>Only the selected low-lying excited states are presented. <sup>b</sup>Oscillator strength. <sup>c</sup>Only the main configurations are presented.

<sup>d</sup>Contributions over 10% are presented. <sup>e</sup>MLCT: metal to ligand charge transfer; LLCT: ligand to ligand charge transfer; ILCT: intra-ligand charge transfer (L: bpy; L': NBD-bpy or OH-bpy).

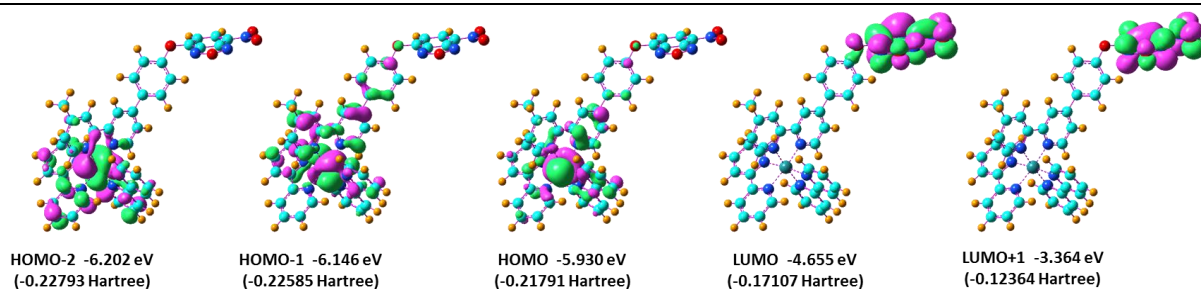

**Figure S5.** Representative frontier molecular orbital distributions of **Ru-NBD** and their corresponding energy at excited state ( $T_1$ ) optimized geometries (isodensity contour = 0.02 a.u.).

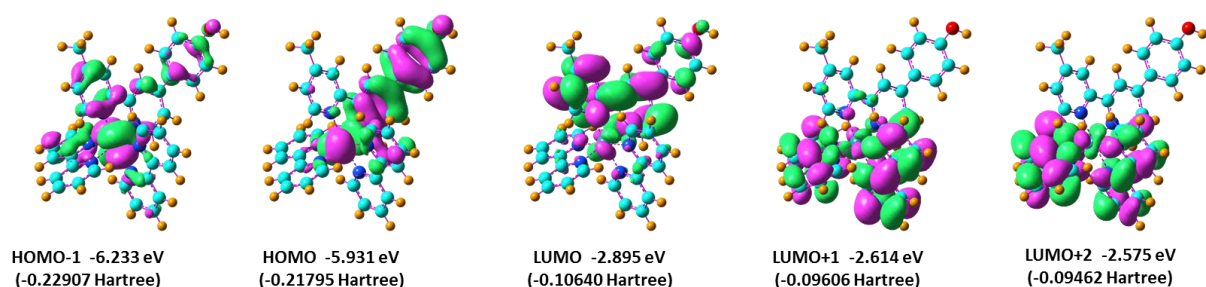

**Figure S6.** Representative frontier molecular orbital distributions of **Ru-OH** and their corresponding energy at excited state ( $T_1$ ) optimized geometries (isodensity contour = 0.02 a.u.).

**Table S4.** Selected electronic excitation energies (eV) and corresponding oscillator strengths ( $f$ ), main configurations and contributions of the low-lying electronically excited states of **Ru-NBD** and **Ru-OH** in aqueous solution from the calculation conducted by TDDFT//B3LYP//6-311+G(d, p), based on the optimized molecular geometries in the first excited triplet states of the complexes.

| Complexes     | State | Energy (eV) <sup>a</sup> | Wavelength (nm) | $f^b$  | Composition <sup>c</sup>       | Contribution <sup>d</sup> (%) | Assignment <sup>e</sup>                   |
|---------------|-------|--------------------------|-----------------|--------|--------------------------------|-------------------------------|-------------------------------------------|
| <b>Ru-NBD</b> | $T_1$ | 1.0277                   | 1206.37         | 0.0000 | HOMO→LUMO                      | 97.36                         | ET                                        |
|               | $T_2$ | 1.2333                   | 1005.33         | 0.0000 | HOMO-1→LUMO                    | 95.07                         | ET                                        |
|               | $T_3$ | 1.3259                   | 935.08          | 0.0000 | HOMO-2→LUMO                    | 62.82                         | ET                                        |
| <b>Ru-OH</b>  | $T_1$ | 1.8738                   | 661.69          | 0.0000 | HOMO→LUMO                      | 86.35                         | <sup>3</sup> ML'CT,<br><sup>3</sup> IL'CT |
|               | $T_2$ | 2.2793                   | 543.95          | 0.0000 | HOMO-1→LUMO                    | 82.38                         | <sup>3</sup> ML'CT                        |
|               | $T_3$ | 2.3771                   | 521.58          | 0.0000 | HOMO-1→LUMO+1<br>HOMO-1→LUMO+2 | 43.03<br>38.49                | <sup>3</sup> MLCT<br><sup>3</sup> MLCT    |

<sup>a</sup>Only the selected low-lying excited states are presented. <sup>b</sup>Oscillator strength. <sup>c</sup>Only the main configurations are presented. <sup>d</sup>Contributions over 10% are presented. <sup>e</sup>MLCT: metal to ligand charge transfer; LLCT: ligand to ligand charge transfer; ILCT: intra-ligand charge transfer (L: ppy; L': NBD-bpy or OH-bpy).



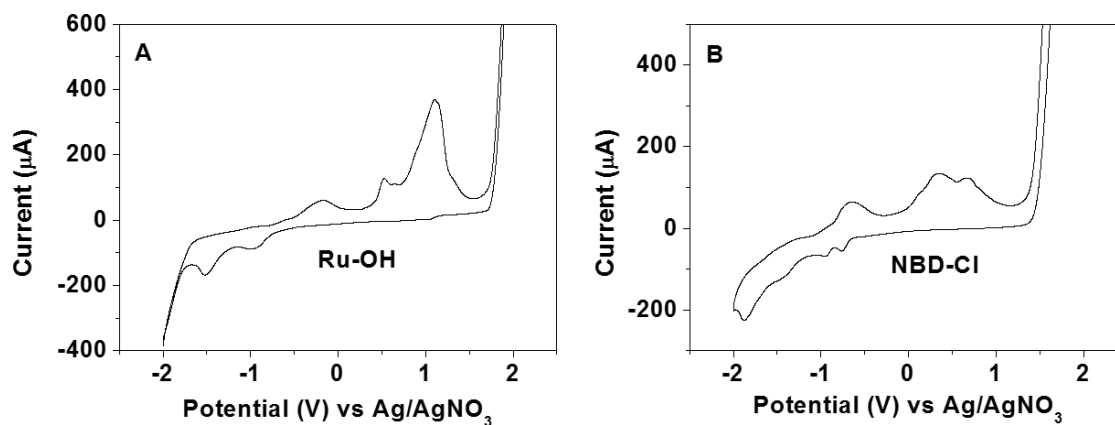

**Figure S7.** Cyclic voltammograms of 1.0 mM **Ru-OH** (A) and **NBD-Cl** (B) in CH<sub>3</sub>CN containing 0.1 M TBAPF<sub>6</sub>. Scan rate: 0.1 V/s. Working electrode: platinum; counter electrode: platinum wire; reference electrode: Ag/AgNO<sub>3</sub>.

### 3. Characterizations of Ru-NBD

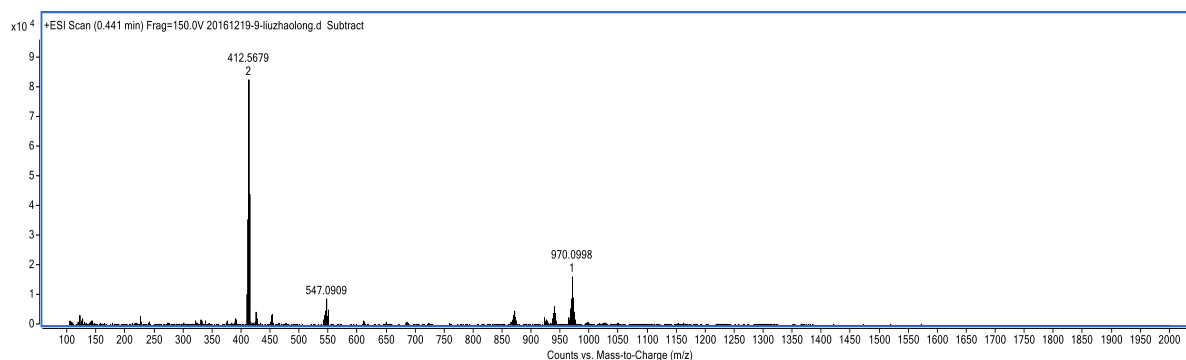

**Figure S8.** ESI-HRMS of **Ru-NBD**.

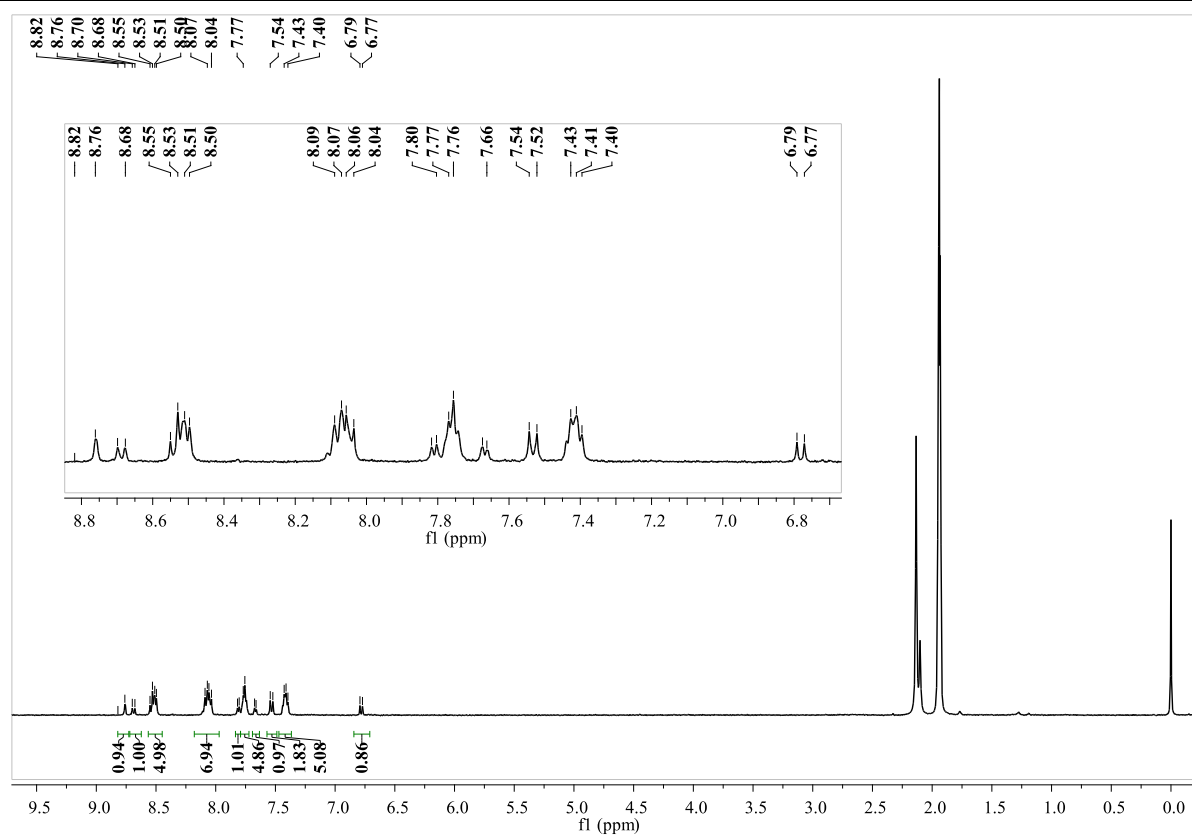

**Figure S9.**  $^1\text{H}$  NMR spectrum of Ru-NBD.

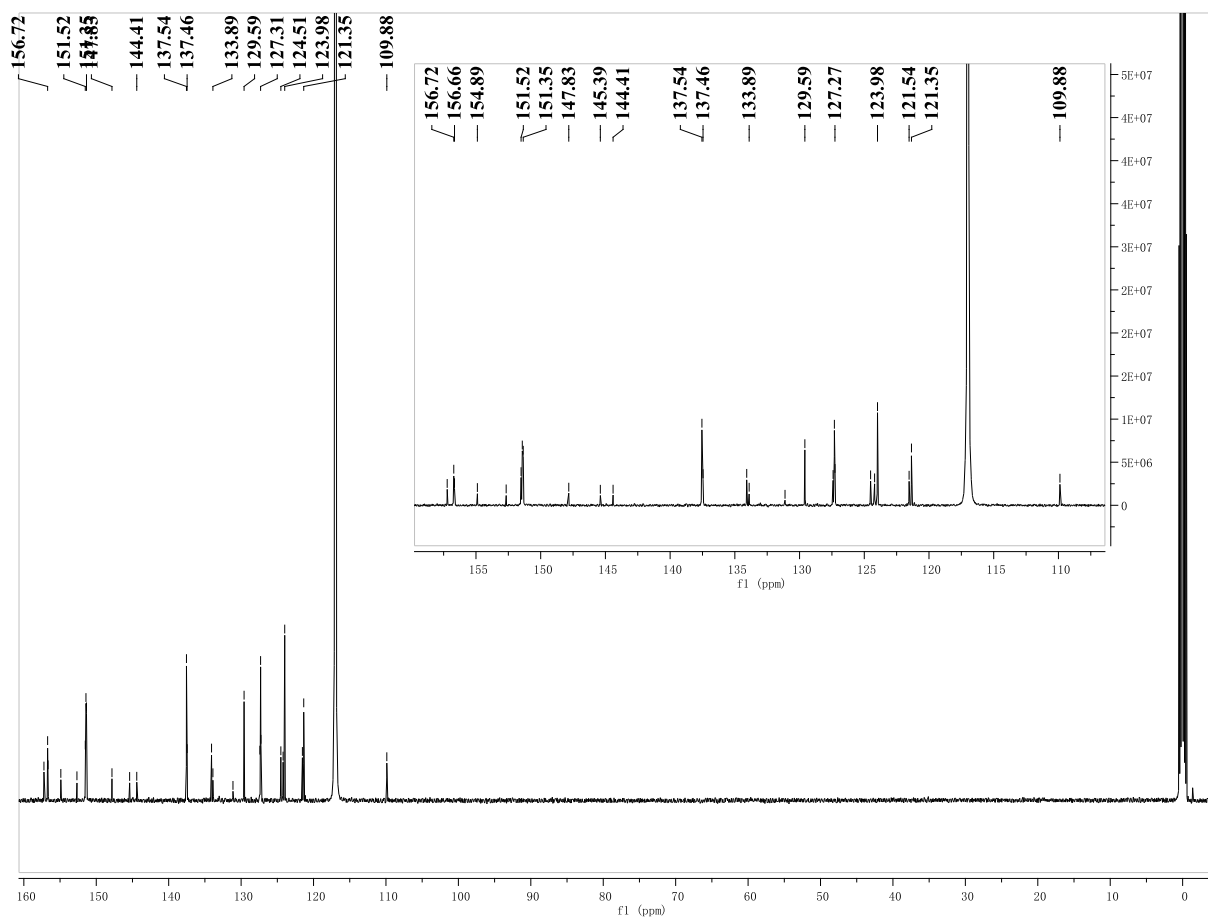

Figure S10.  $^{13}\text{C}$  NMR spectrum of Ru-NBD.

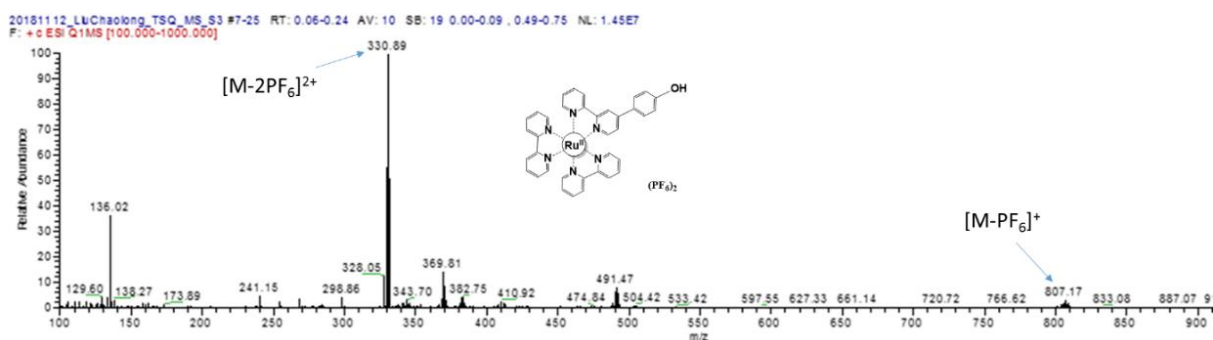

Figure S11. MS of the product Ru-OH after Ru-NBD (20  $\mu\text{M}$ ) reacted with Cys (200  $\mu\text{M}$ ).

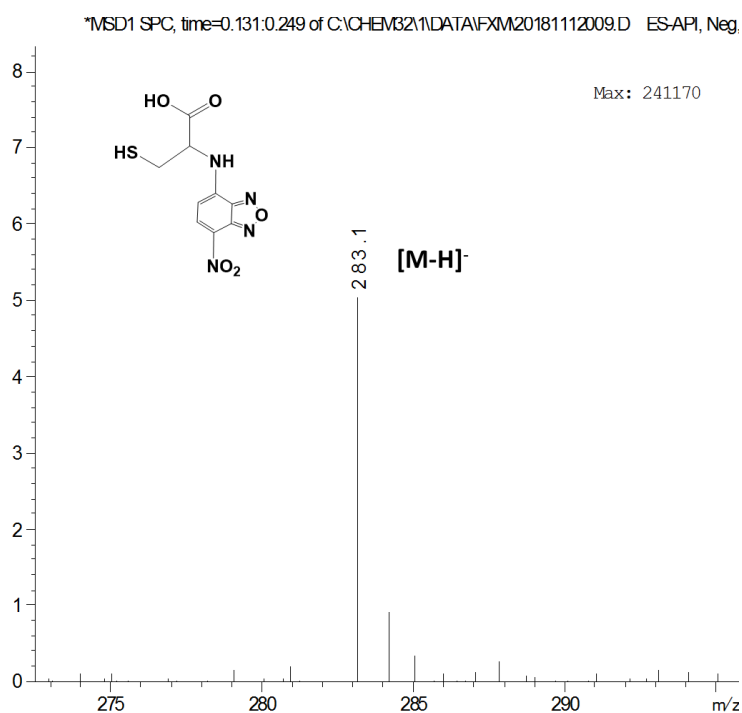

Figure S12. MS of NBD-NR1.

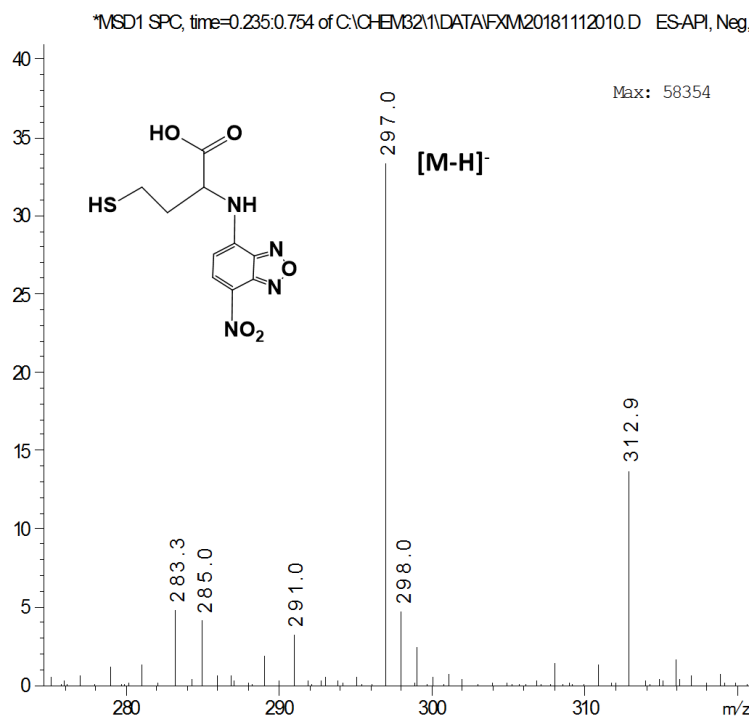

Figure S13. MS of NBD-NR2.

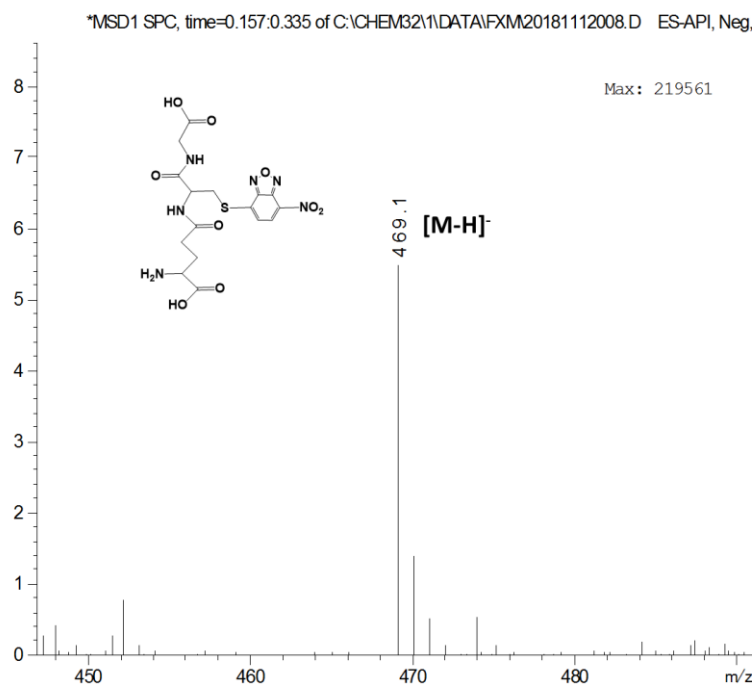

Figure S14. MS of NBD-SR.

#### 4. Luminescence spectra of Ru-NBD for biothiols

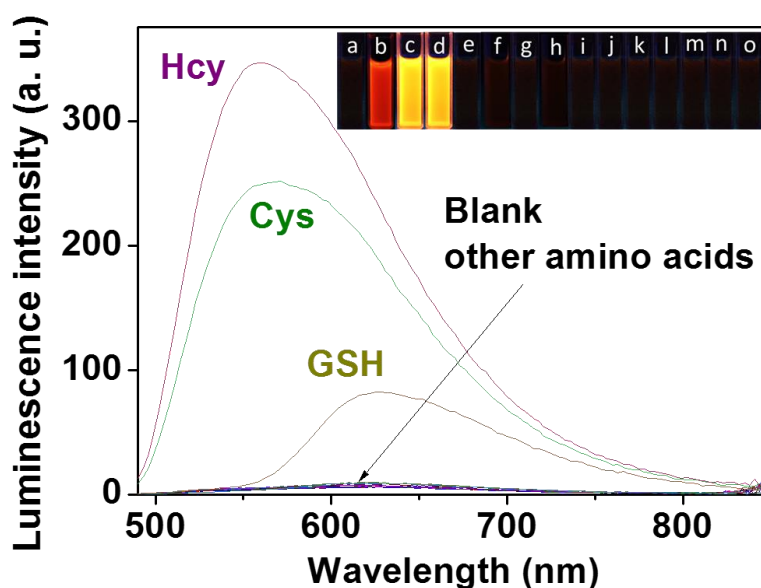

Figure S15. Luminescence intensities of **Ru-NBD** (10  $\mu$ M) upon reaction with various amino acids (100  $\mu$ M) in 50 mM Tris-HCl buffer of pH 7.4. Inset: luminescence color photographs of the products of **Ru-NBD** reacted with different amino acids under a 365 nm UV lamp. Amino acids: (a) blank, (b) GSH, (c) Cys, (d) Hcy, (e) tryptophan, (f) threonine, (g) glycine, (h) valine, (i) leucine, (j) histidine, (k) proline, (l) serine, (m) tyrosine, (n) alanine, and (o) aspartic acid.

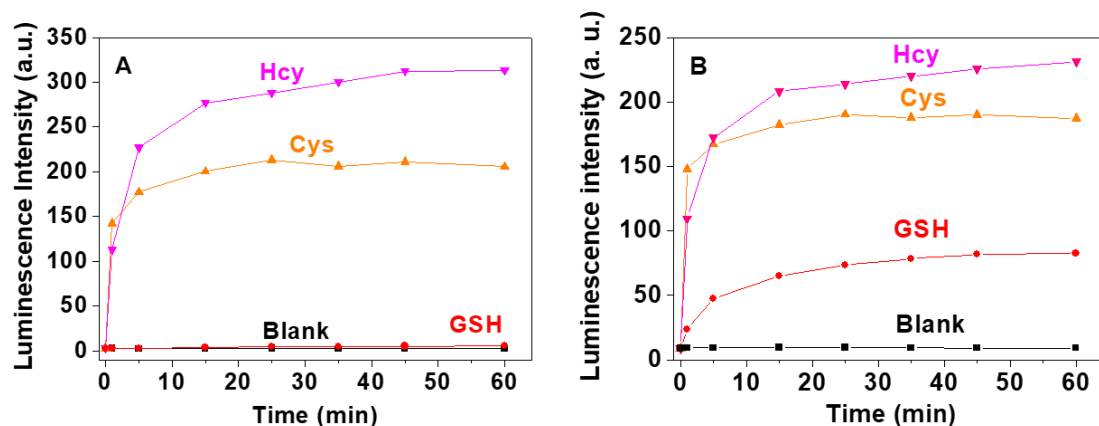

**Figure S16.** Time courses luminescence response of **Ru-NBD** (10 μM) to different biothiols (200 μM) in 50 mM Tris-HCl buffer (pH 7.4).  $\lambda_{ex} = 480$  nm;  $\lambda_{em} = 540$  nm (A);  $\lambda_{em} = 628$  nm (B).

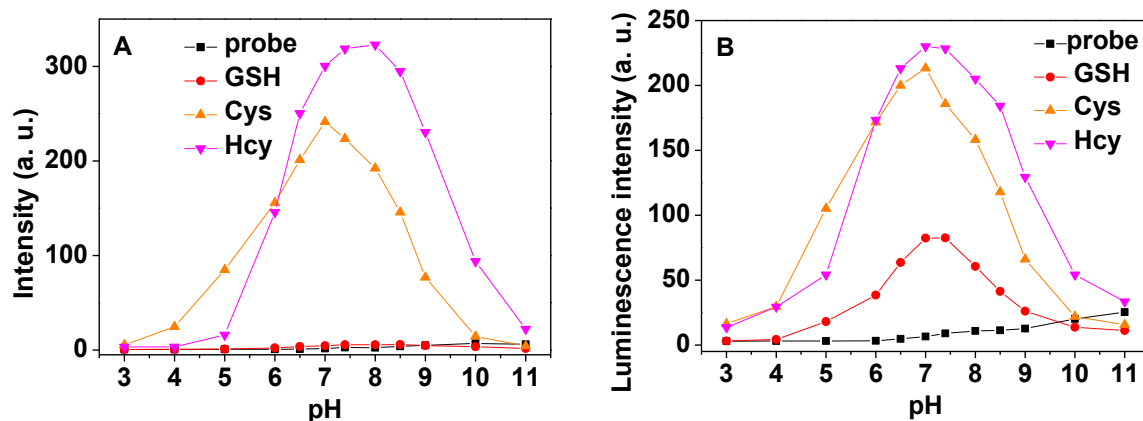

**Figure S17.** Luminescence intensity changes of **Ru-NBD** (10 μM) in Tris-HCl buffer with different pH in the absence and presence of 20 equiv. of GSH, Cys and Hcy.  $\lambda_{ex} = 480$  nm;  $\lambda_{em} = 540$  nm (A);  $\lambda_{em} = 628$  nm (B).

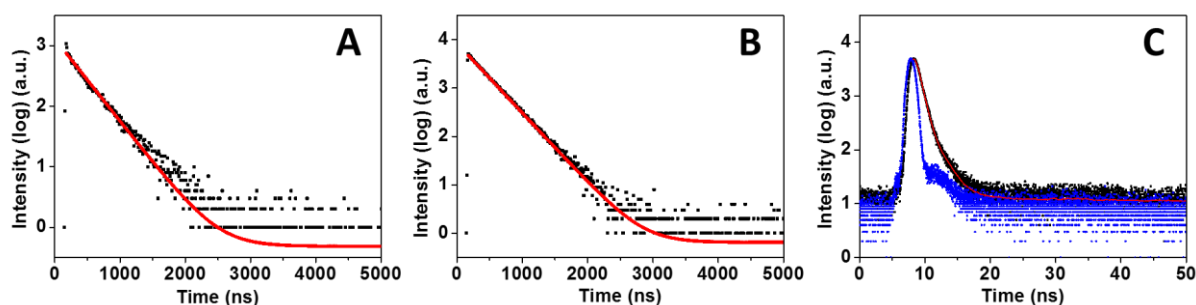

**Figure S18.** The luminescence decay traces of **Ru-NBD** (A), **Ru-OH** (B) and **NBD-NR1**(C).

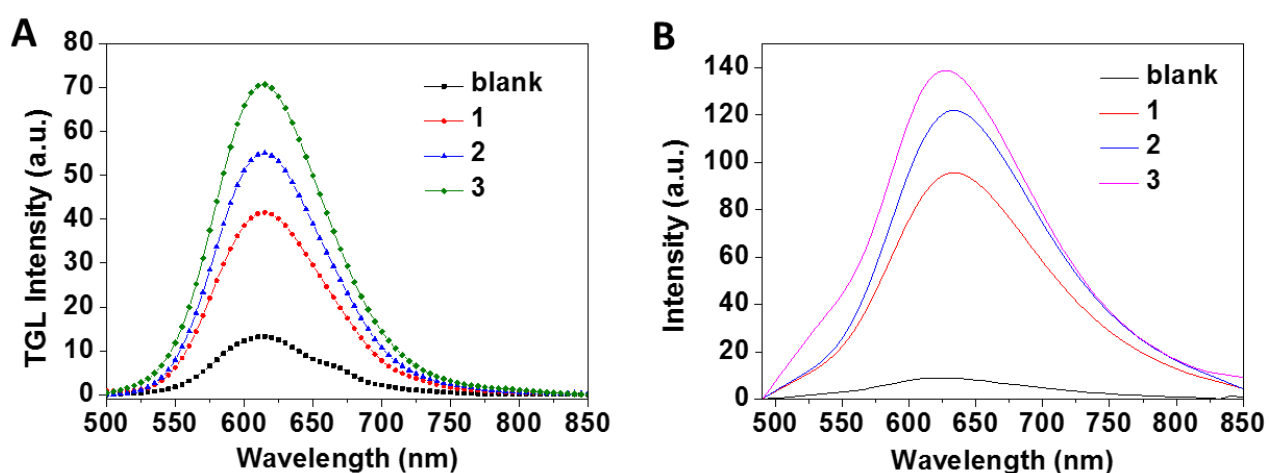

**Figure S19.** Time-gated (A, delay time: 100 ns) and steady-state (B, delay time: 0 ns) emission spectra. Mixture was 8-fold diluted for Time-gated luminescence analysis. Excitation was performed at 450 nm.

**Table S5.** Detection of biothiols using **Ru-NBD** probe under phosphorescence and time-gated luminescence assay model.

| Sample number       | Total biothiols | Found ( $\mu\text{M}$ ) (n=3) | Recovery biothiols (%) | Added Cys ( $\mu\text{M}$ ) | Found Cys ( $\mu\text{M}$ ) (n=3) | Recovery Cys (%) | Added GSH ( $\mu\text{M}$ ) | Found ( $\mu\text{M}$ ) (n=3) | Recovery GSH (%) |
|---------------------|-----------------|-------------------------------|------------------------|-----------------------------|-----------------------------------|------------------|-----------------------------|-------------------------------|------------------|
| 1 (mixture)         | 16              | $16.56 \pm 0.53$              | 103.50                 | -                           | $9.05 \pm 0.23$                   | 113.12           | -                           | $7.51 \pm 0.31$               | 85.86            |
| 2 (mixture+GSH)     | 22              | $21.52 \pm 0.56$              | 97.82                  | -                           | $9.02 \pm 0.16$                   | 112.75           | 6                           | $12.50 \pm 0.21$              | 89.29            |
| 3 (mixture+GSH+Cys) | 28              | $30.08 \pm 0.33$              | 107.43                 | 6                           | $15.37 \pm 0.15$                  | 109.78           | 6                           | $14.71 \pm 0.19$              | 105.07           |

## 5. Detection and discrimination of biothiols in live cells and organisms

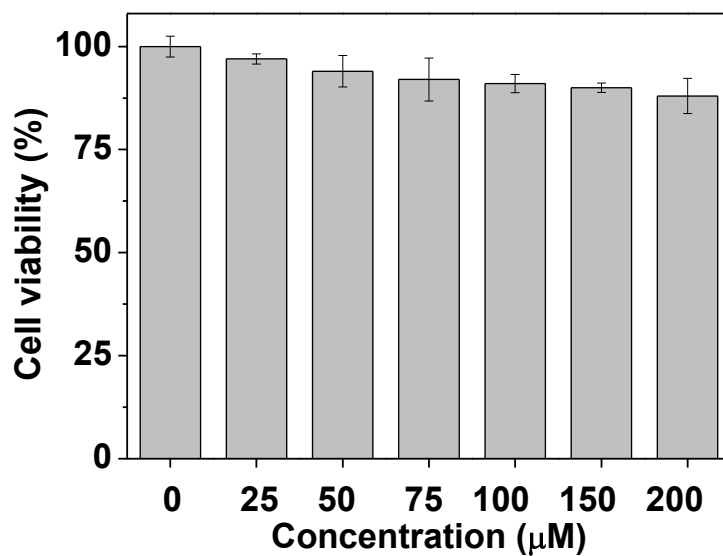

**Figure S20.** Viabilities of HeLa cells incubated with **Ru-NBD** at increasing concentrations (0, 25, 50, 75, 100, 150 and 200 μM) for 24 h at 37 °C.

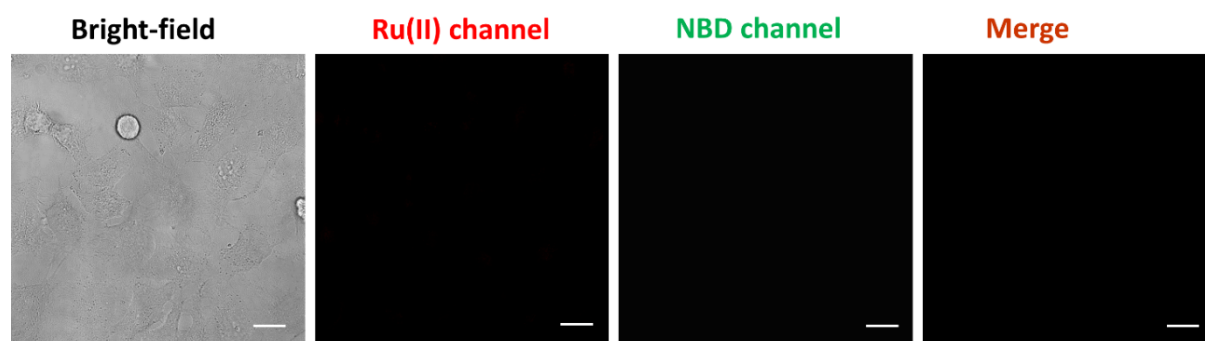

**Figure S21.** Bright field and luminescence imaging of HeLa cells. Scale bar: 20 μm.



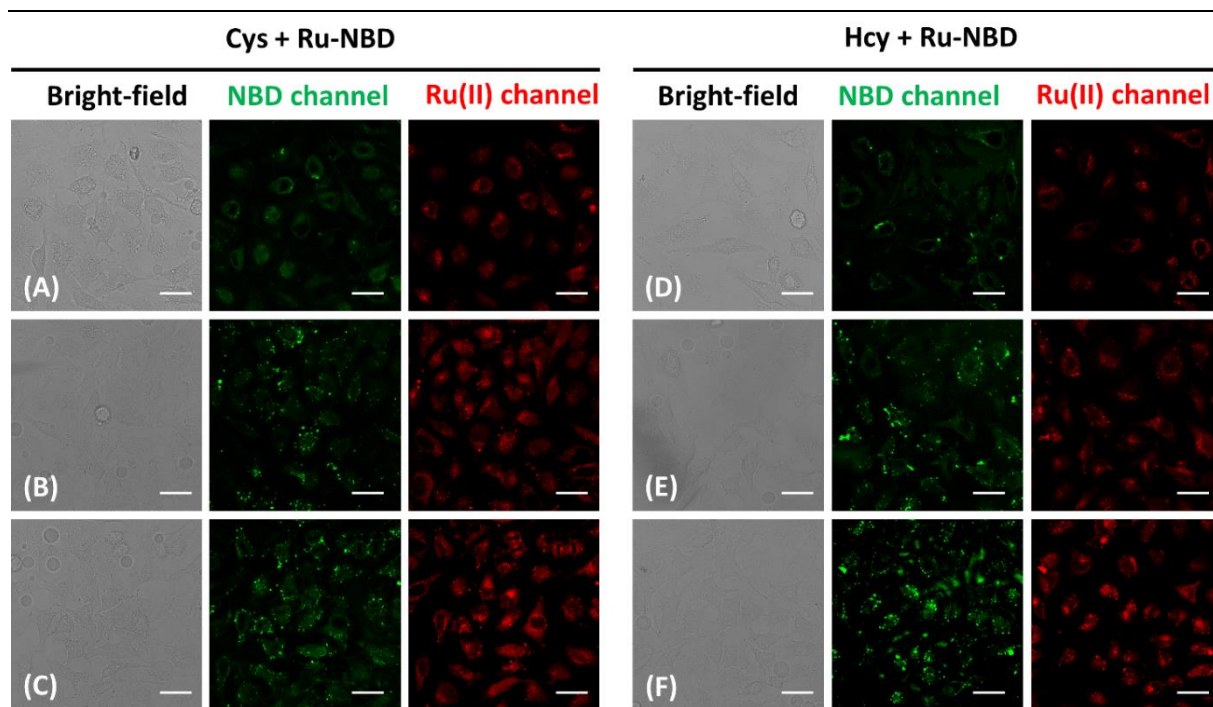

**Figure S22.** Luminescence imaging of exogenous and endogenous Cys (A-C) and Hcy (D-F) in HeLa cells. HeLa cells were incubated 200 (A, D), 400 (B, E) and 1600  $\mu\text{M}$  (C, F) Cys and Hcy, respectively, and then treated with **Ru-NBD** (50  $\mu\text{M}$ ).

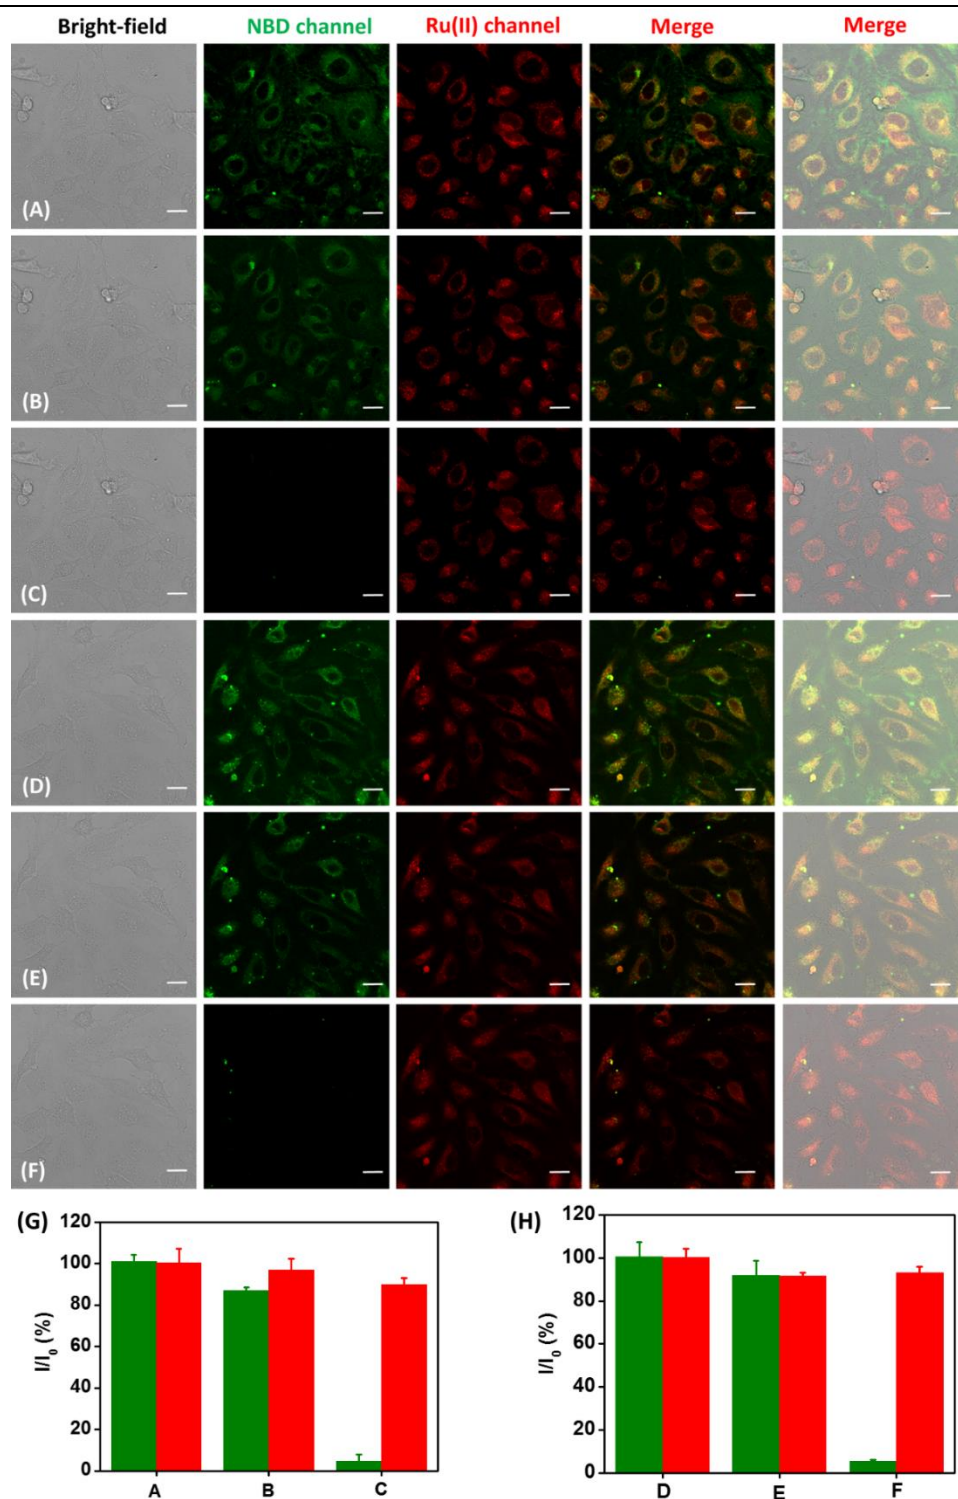

**Figure S23.** Time-gated luminescence imaging of HeLa cells treated with 400  $\mu\text{M}$  Cys (A-C) and Hcy (D-F) and 50  $\mu\text{M}$  Ru-NBD. The signals from green NBD channel were collected within 0-12 ns (A, D), 0-4 ns (B, E), and 4-12 ns (C, F). The signals from red Ru(II) channel were collected under normal condition (inactive time-gated luminescence imaging). Changes of intracellular red and green signals of group A-C (G) and D-F (H). Scale bar: 20  $\mu\text{m}$ .

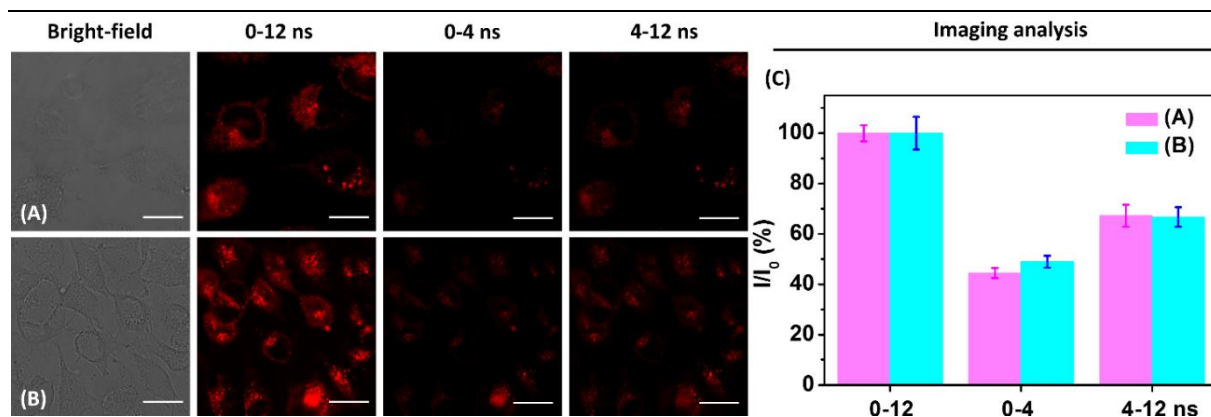

**Figure S24.** Time-gated luminescence imaging of HeLa cells treated with 400  $\mu$ M Cys (A) and Hcy (B) and 50  $\mu$ M Ru-NBD. The signals from red Ru(II) channel were collected within 0-12 ns (A, D), 0-4 ns (B, E), and 4-12 ns (D, F). Changes of intracellular red and green signals (C). Scale bar: 20  $\mu$ m.

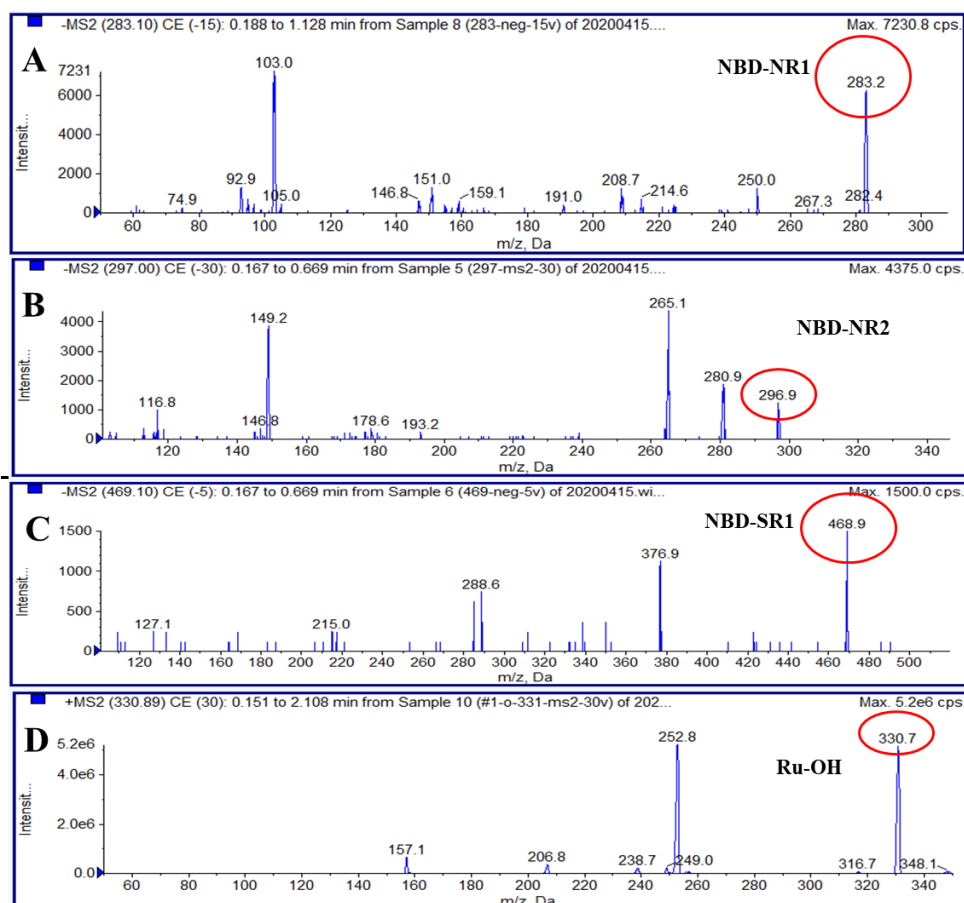

**Figure S25.** MS of NBD-NR1 (A), NBD-NR2 (B), NBD-SR1 (C), and Ru-OH (D) in cell lysate.

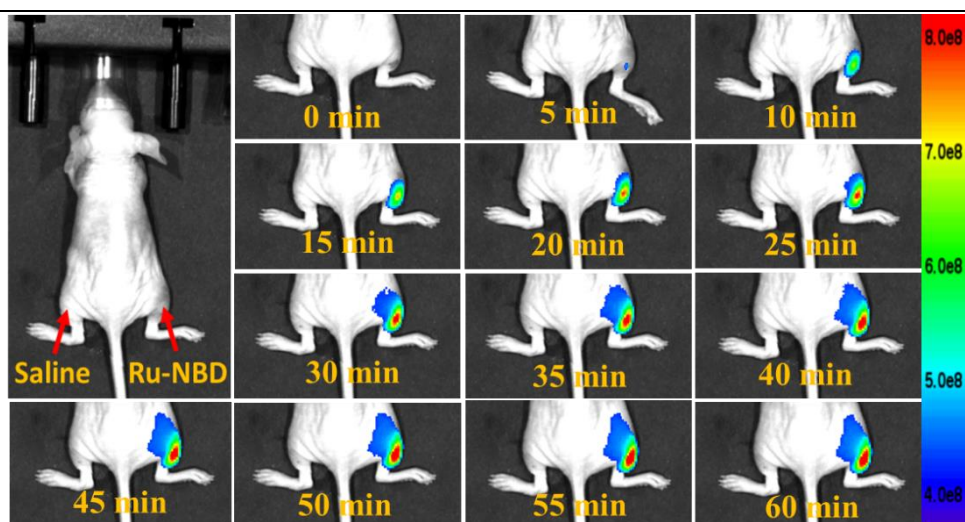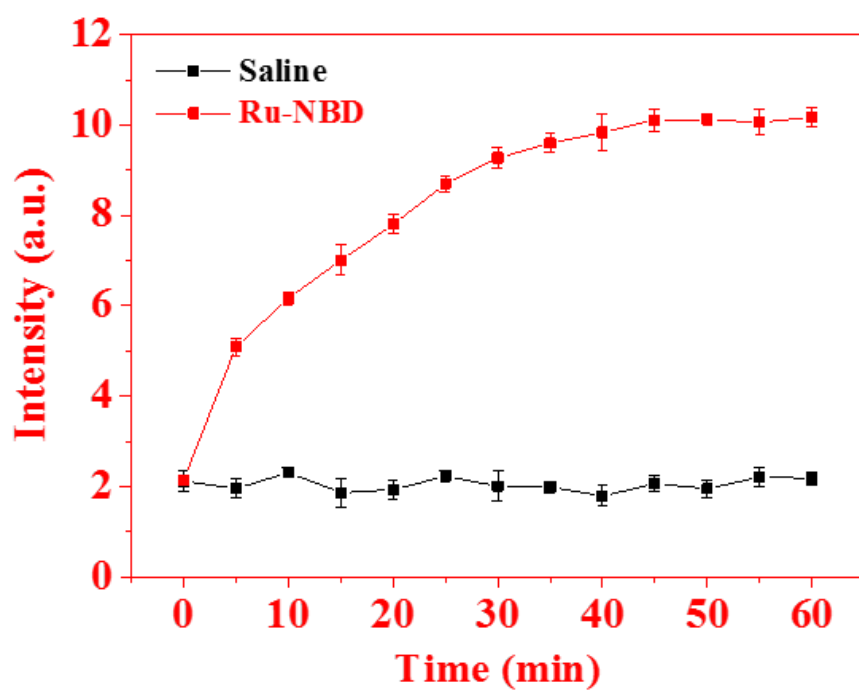

**Figure S26.** Luminescence imaging of biothiols in live mice using **Ru-NBD** as a probe. Ex: 465nm, Em: 610 nm.

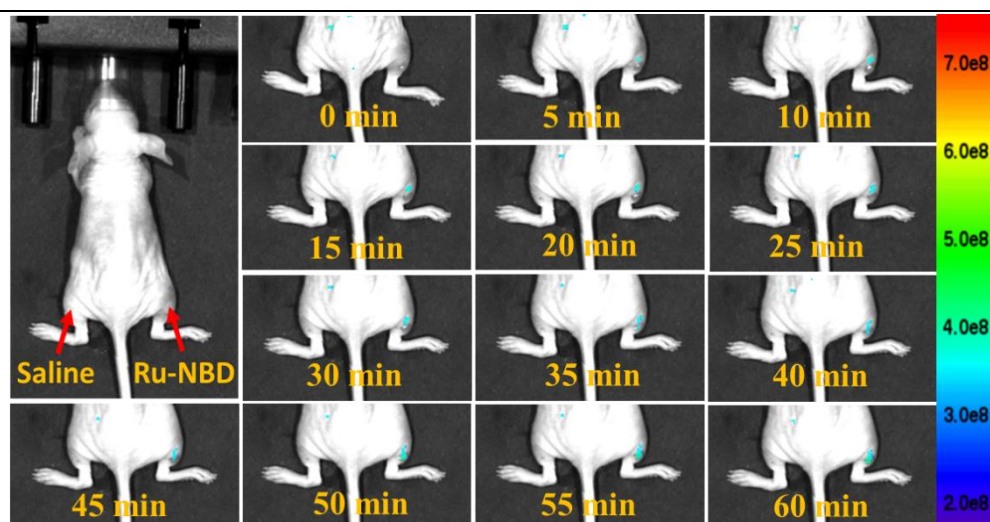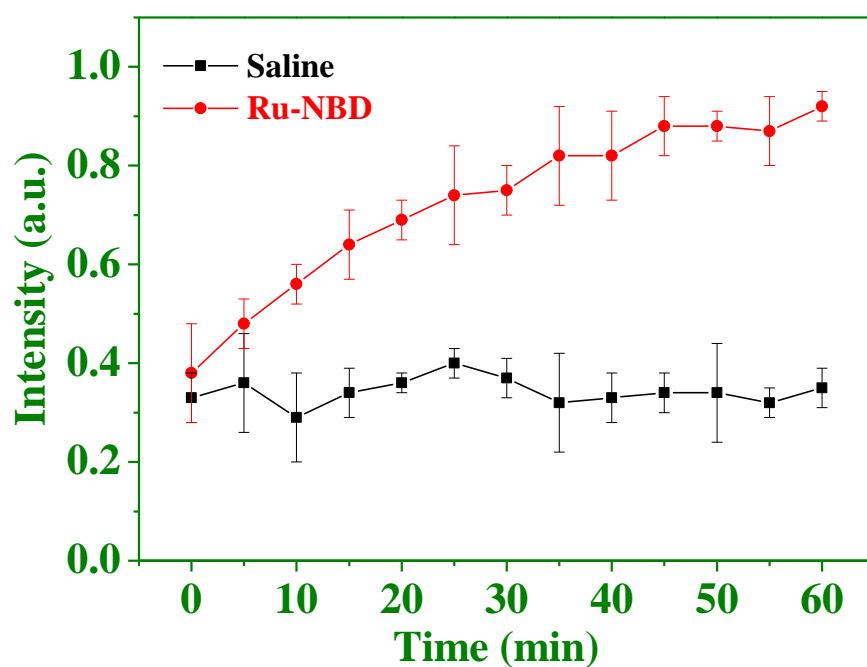

**Figure S27.** Luminescence imaging of biothiols in live mice using **Ru-NBD** as a probe. Ex: 465 nm, Em: 530 nm.

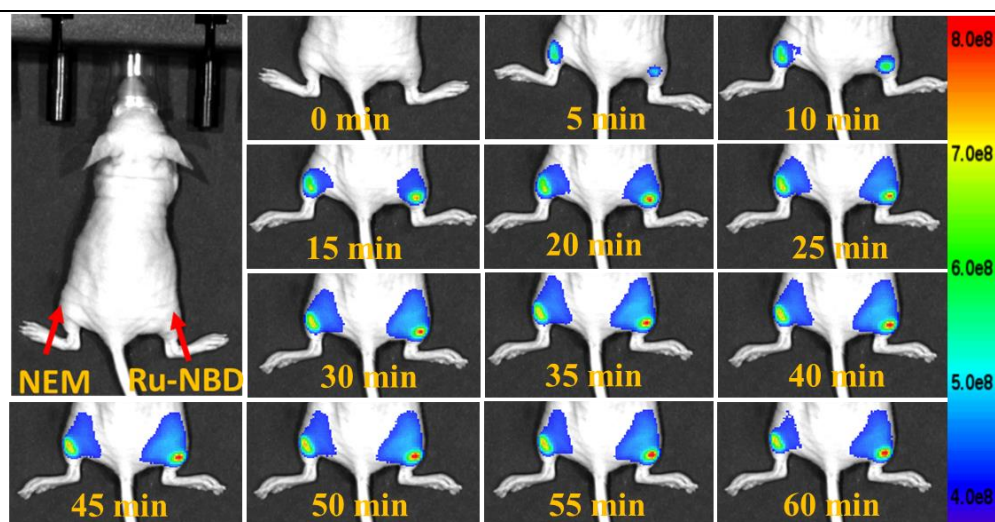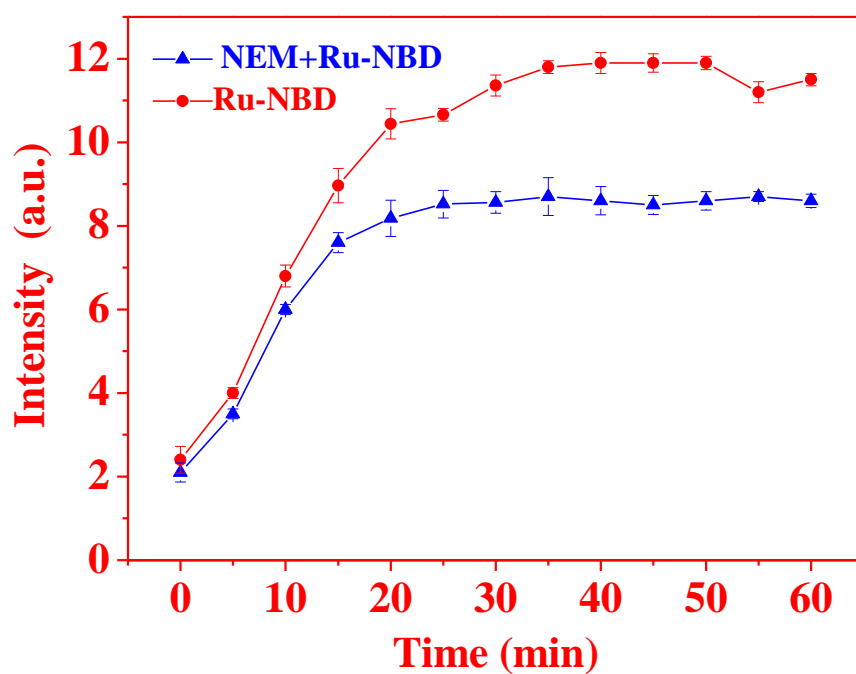

**Figure S28.** Luminescence imaging of biothiols in live mice using Ru-NBD as a probe. Ex: 465nm, Em: 610 nm.

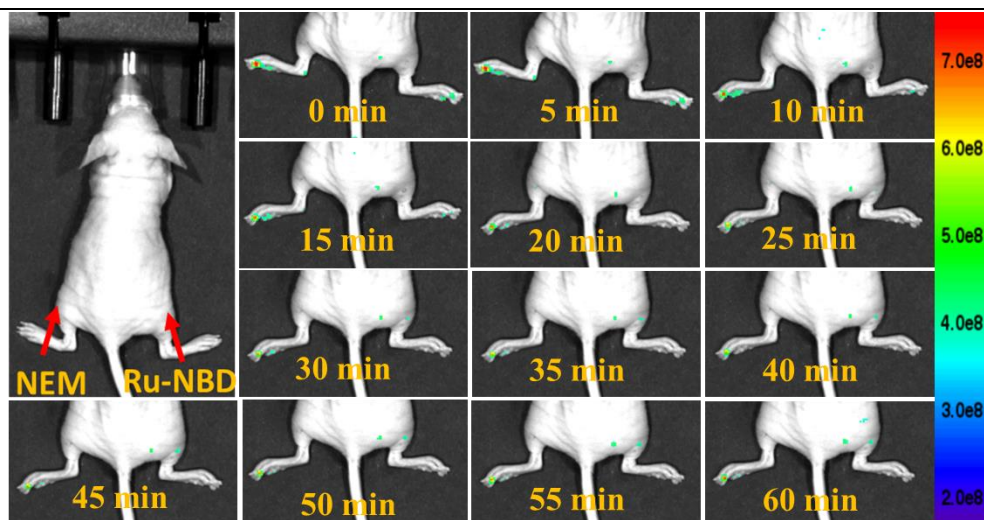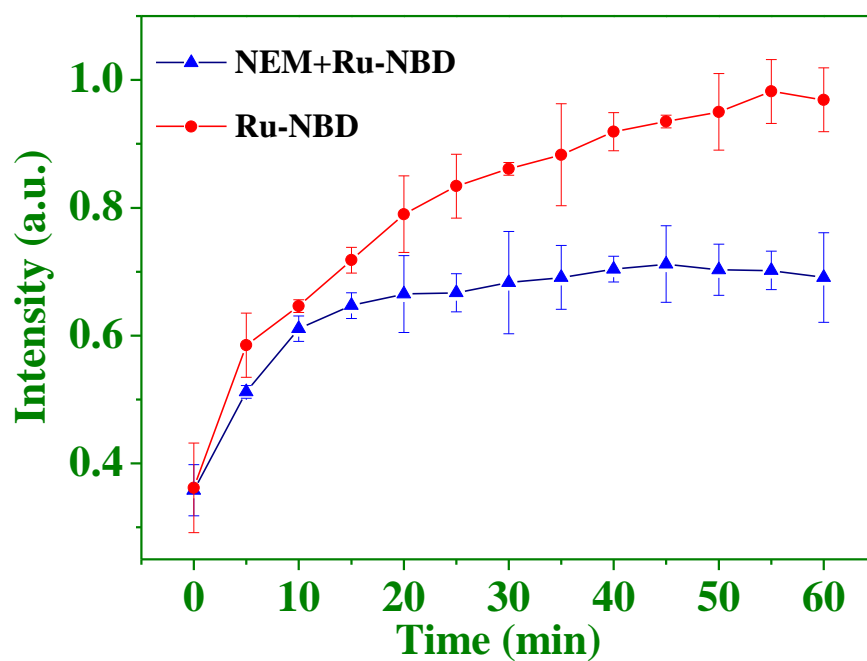

**Figure S29.** Luminescence imaging of biothiols in live mice using **Ru-NBD** as a probe. Ex: 465 nm, Em: 530 nm.

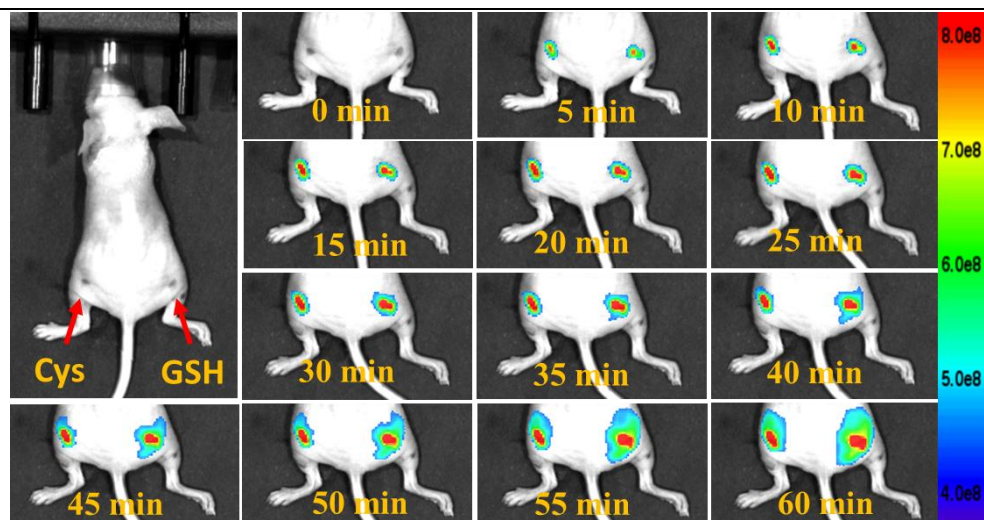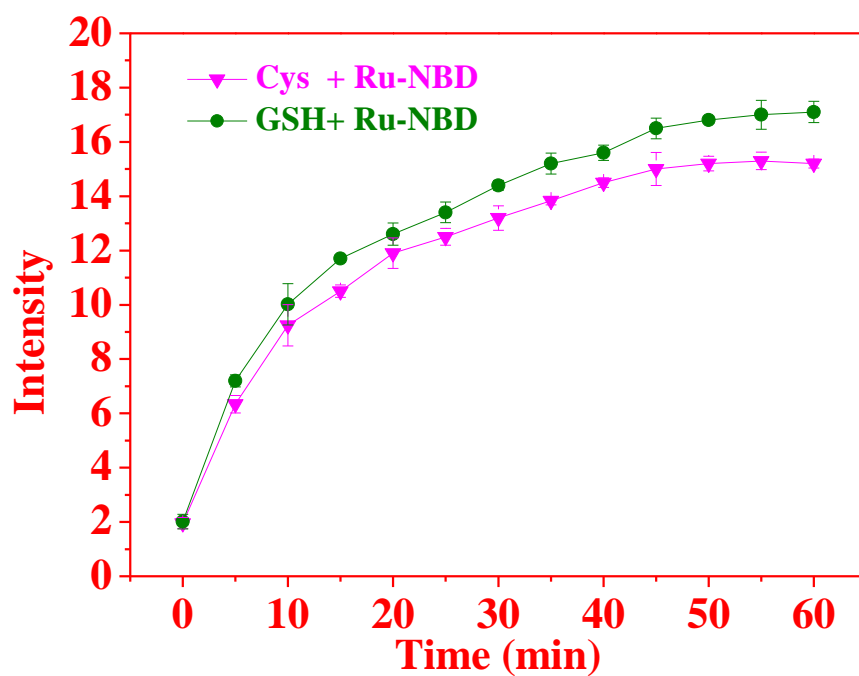

**Figure S30.** Luminescence imaging of biothiols in live mice using **Ru-NBD** as a probe. Ex: 465 nm, Em: 610 nm.



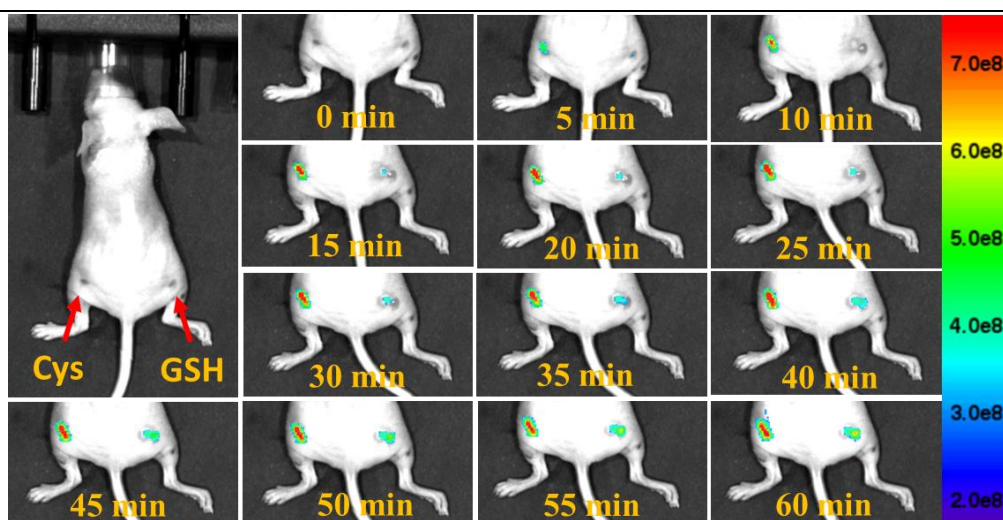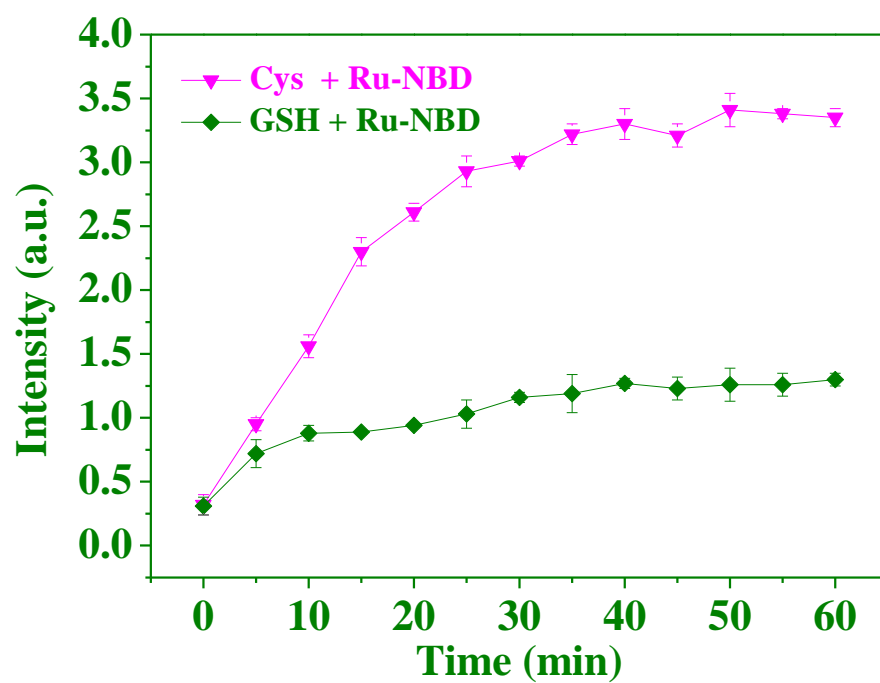

**Figure S31.** Luminescence imaging of biothiols in live mice using **Ru-NBD** as a probe. Ex: 465 nm, Em: 530 nm.

**Table S6.** Summary of the sensing performance of the probes in published papers and current work.

| probe                                                                               | $\lambda_{\text{ex}}/\lambda_{\text{em}}$ (nm)                                            | Detection limit ( $\mu\text{M}$ )      | discrimination of biothiols    | Detect total biothiols | Application       | Literature |
|-------------------------------------------------------------------------------------|-------------------------------------------------------------------------------------------|----------------------------------------|--------------------------------|------------------------|-------------------|------------|
| 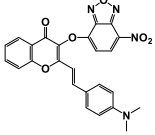   | $\lambda_{\text{ex}}$ : 458<br>$\lambda_{\text{em}}$ : 621 (GSH)<br>621/545 (Cys/Hcy)     | 6.4 (GSH)<br>2.1 (Cys)<br>2.7 (Hcy)    | discrimination GSH and Cys/Hcy | NO                     | cell              | 8          |
|    | $\lambda_{\text{ex}}$ : 470/670<br>$\lambda_{\text{em}}$ : 730 (GSH)<br>540/730 (Cys/Hcy) | 0.05 (GSH)<br>0.08 (Cys)<br>0.17 (Hcy) | discrimination GSH and Cys/Hcy | NO                     | cell              | 9          |
|   | $\lambda_{\text{ex}}$ : 475<br>$\lambda_{\text{em}}$ : 535 (Cys/Hcy)                      | 0.1 (Cys/Hcy)                          | discrimination Cys and Hcy     | NO                     | cell              | 10         |
|  | $\lambda_{\text{ex}}$ : 368<br>$\lambda_{\text{em}}$ : 585 (Cys/Hcy)                      | 0.0054 (Cys)<br>0.007 (Hcy)            | NO                             | NO                     | cell              | 11         |
|  | $\lambda_{\text{ex}}$ : 370/700<br>$\lambda_{\text{em}}$ : 495/795 (GSH)                  | 0.153 (495)<br>0.171 (795)             | NO                             | NO                     | Dual channel Cell | 12         |
|  | $\lambda_{\text{ex}}$ : 580/720<br>$\lambda_{\text{em}}$ : 640/785                        | 0.2                                    | NO                             | NO                     | ratio             | 13         |
|  | $\lambda_{\text{ex}}$ : 465<br>$\lambda_{\text{em}}$ : 585 (Cys)                          | 1.1 (GSH)                              | NO                             | NO                     | Reversible Cell   | 14         |
|  | $\lambda_{\text{ex}}$ : 470<br>$\lambda_{\text{em}}$ : 620 (Cys)                          | 3.2 (Cys)                              | NO                             | NO                     | Cell Zebrafish    | 15         |

|                                                                                     |                                                                                                        |                                                                                        |                                       |     |                              |           |
|-------------------------------------------------------------------------------------|--------------------------------------------------------------------------------------------------------|----------------------------------------------------------------------------------------|---------------------------------------|-----|------------------------------|-----------|
| 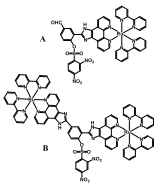   | $\lambda_{ex}$ : 461<br>$\lambda_{em}$ : 608                                                           | A: 0.23 (GSH)<br>0.22 (Cys)<br>0.50 (Hcy)<br>B: 0.64 (GSH)<br>0.70 (Cys)<br>1.07 (Hcy) | NO                                    | NO  | Cell                         | 16        |
|    | $\lambda_{ex}$ : 458<br>$\lambda_{em}$ : 608                                                           | A: 0.47 (Cys)<br>0.27 (GSH)<br>B: 0.30 (Cys)<br>0.24 (GSH)                             | NO                                    | NO  | Cell                         | 17        |
|    | $\lambda_{ex}$ : 459<br>$\lambda_{em}$ : 620                                                           | 0.062 (GSH)<br>0.146 (Cys)<br>0.115 (Hcy)                                              | NO                                    | Yes | Cell<br>Daphnia magna<br>TGL | 18        |
|    | A: 526 (GSH)<br>390 (Cys/Hcy)<br>B: 550 (GSH)<br>410 (Cys/Hcy)                                         | A: 0.31 (Cys)<br>0.01 (GSH)<br>B: 1.27 (Cys)<br>0.017 (GSH)                            | Discrimination of<br>GSH and Cys/Hcy  | Yes | Cell mice                    | 19        |
|   | $\lambda_{ex}$ : 480 (Cys)<br>360 (Hcy)<br>400 (GSH)<br>$\lambda_{em}$ : 457(Cys)<br>559(Hcy) 529(GSH) | 0.0005(Cys)<br>0.0036(Hcy)<br>0.0069(GSH)                                              | Discrimination of<br>GSH, Cys and Hcy | NO  | Cell                         | 20        |
|  | $\lambda_{ex}$ : 375 (Hcy)<br>400 (Cys)<br>500 (GSH)<br>$\lambda_{em}$ : 467(Hcy)<br>503(Cys) 568(GSH) | 0.0007(Hcy)<br>0.0002(Cys)<br>0.001(GSH)                                               | Discrimination of<br>GSH, Cys and Hcy | NO  | Cell                         | 21        |
|  | $\lambda_{ex}$ : 360 (Cys)<br>450 (GSH)<br>$\lambda_{em}$ : 420(Cys)<br>512(GSH)                       | 0.05 (GSH)<br>>0.4 (Cys)                                                               | Discrimination of<br>GSH and Cys      | NO  | Cell                         | 22        |
|  | $\lambda_{ex}$ : 480 (Cys)<br>$\lambda_{em}$ : 540 (Cys/Hcy)<br>628(GSH/Cys/Hcy)                       | 0.1389(GSH)<br>0.1964(Cys)<br>0.0829(Hcy)                                              | Discrimination of<br>Cys/Hcy and GSH  | Yes | Cell Zebrafish<br>Mice TGL   | This work |

## REFERENCE

- [1] a) R. Zhang, Z. Ye, Y. Yin, G. Wang, D. Jin, J. Yuan, J. A. Piper, *Bioconjugate Chem.* **2012**, *23*, 725; b) Q. Gao, W. Zhang, B. Song, R. Zhang, W. Guo, J. Yuan, *Anal. Chem.* **2017**, *89*, 4517.
- [2] M. J. Frisch, G. W. Trucks, H. B. Schlegel, G. E. Scuseria, M. A. Robb, J. R. Cheeseman, G. Scalmani, V. Barone, B. Mennucci, G. A. Petersson, H. Nakatsuji, M. Caricato, X. Li, H. P. Hratchian, A. F. Izmaylov, J. Bloino, G. Zheng, J. L. Sonnenberg, M. Hada, M. Ehara, K. Toyota, R. Fukuda, J. Hasegawa, M. Ishida, T. Nakajima, Y. Honda, O. Kitao, H. Nakai, T. Vreven, J. A. Montgomery Jr., J. E. Peralta, F. Ogliaro, M. J. Bearpark, J. Heyd, E. N. Brothers, K. N. Kudin, V. N. Staroverov, R. Kobayashi, J. Normand, K. Raghavachari, A. P. Rendell, J. C. Burant, S. S. Iyengar, J. Tomasi, M. Cossi, N. Rega, N. J. Millam, M. Klene, J. E. Knox, J. B. Cross, V. Bakken, C. Adamo, J. Jaramillo, R. Gomperts, R. E. Stratmann, O. Yazyev, A. J. Austin, R. Cammi, C. Pomelli, J. W. Ochterski, R. L. Martin, K. Morokuma, V. G. Zakrzewski, G. A. Voth, P. Salvador, J. J. Dannenberg, S. Dapprich, A. D. Daniels, Ö. Farkas, J. B. Foresman, J. V. Ortiz, J. Cioslowski, D. J. Fox, Gaussian, Inc., Wallingford, CT, USA **2009**.
- [3] J. Wang, F. Q. Bai, B. H. Xia, H. X. Zhang, *J. Phys. Chem. A* **2011**, *115*, 11689.
- [4] a) S. Ji, H. Guo, W. Wu, W. Wu, J. Zhao, *Angew. Chem. Int. Ed.* **2011**, *50*, 8283; b) K. Fujimoto, K. Kawai, S. Masuda, T. Mori, T. Aizawa, T. Inuzuka, T. Karatsu, M. Sakamoto, S. Yagai, T. Sengoku, M. Takahashi, H. Yoda, *Langmuir : the ACS journal of surfaces and colloids* **2019**, *35*, 9740.
- [5] M. Cossi, V. Barone, *J. Chem. Phys.* **2001**, *115*, 4708.
- [6] a) Y. Urano, M. Kamiya, K. Kanda, T. Ueno, K. Hirose, T. Nagano, *J. Am. Chem. Soc.* **2005**, *127*, 4888; b) K. Komatsu, K. Kikuchi, H. Kojima, Y. Urano, T. Nagano, *J. Am. Chem. Soc.* **2005**, *127*, 10197; c) X. Zhang, L. Chi, S. Ji, Y. Wu, P. Song, K. Han, H. Guo, T. D. James, J. Zhao, *J. Am. Chem. Soc.* **2009**, *131*, 17452.

- [7] a) X. Yang, Y. Guo, R. M. Strongin, *Angew. Chem. Int. Ed.* **2011**, *50*, 10690; b) Y. Lyu, K. Pu, *Adv. Sci.* **2017**, *4*, 1600481; c) C. Liu, W. Chen, W. Shi, B. Peng, Y. Zhao, H. Ma, M. Xian, *J. Am. Chem. Soc.* **2014**, *136*, 7257.
- [8] W. Chen, H. Luo, X. Liu, J. W. Foley, X. Song, *Anal. Chem.* **2016**, *88*, 3638.
- [9] H. J. Xiang, H. P. Tham, M. D. Nguyen, S. Z. Fiona Phua, W. Q. Lim, J. G. Liu, Y. Zhao, *Chem. Commun.* **2017**, *53*, 5220.
- [10] D. Lee, G. Kim, J. Yin, J. Yoon, *Chem. Commun.* **2015**, *51*, 6518.
- [11] X. Liu, H. Tian, L. Yang, Y. Su, M. Guo, X. Song, *Tetrahedron Lett.* **2017**, *58*, 3209.
- [12] Z. Xu, X. Huang, X. Han, D. Wu, B. Zhang, Y. Tan, M. Cao, S. H. Liu, J. Yin, J. Yoon, *Chem* **2018**, *4*, 1609.
- [13] K. Yin, F. Yu, W. Zhang, L. Chen, *Biosens. Bioelectron.* **2015**, *74*, 156.
- [14] P. Zhang, Y. Wang, W. Huang, Z. Zhao, H. Li, H. Wang, C. He, J. Liu, Q. Zhang, *Sens. Actuators, B* **2018**, *255*, 283.
- [15] Y. Li, N. Shi, M. Li, *New J. Chem.* **2019**, *43*, 18517.
- [16] Z. B. Zheng, Y. F. Han, Y. Q. Ge, J. C. Cui, J. Zuo, K. Nie, *Spectrochim. Acta, Part A* **2019**, *216*, 328.
- [17] Z.-B. Zheng, J.-C. Cui, Y.-F. Han, Y.-Q. Ge, J. Zuo, W.-X. Hao, *Anal. Methods* **2019**, *11*, 2341.
- [18] Q. Gao, W. Zhang, B. Song, R. Zhang, W. Guo, J. Yuan, *Anal. Chem.* **2017**, *89*, 4517.
- [19] S. V. Mulay, Y. Kim, M. Choi, D. Y. Lee, J. Choi, Y. Lee, S. Jon, D. G. Churchill, *Anal. Chem.* **2018**, *90*, 2648.
- [20] G. X. Yin, T. T. Niu, Y. B. Gan, T. Yu, P. Yin, H. M. Chen, Y. Y. Zhang, H. T. Li, S. Z. Yao, *Angew. Chem., Int. Ed. Engl.* **2018**, *57*, 4991.
- [21] G. Yin, T. Niu, T. Yu, Y. Gan, X. Sun, P. Yin, H. Chen, Y. Zhang, H. Li, S. Yao, *Angew. Chem., Int. Ed. Engl.* **2019**, *58*, 4557.
- [22] J. Liu, Y. Q. Sun, Y. Huo, H. Zhang, L. Wang, P. Zhang, D. Song, Y. Shi, W. Guo, J. *Am. Chem. Soc.* **2014**, *136*, 574.
